# Supplementary material for: The Potential Mechanism of Cancer Patients Appearing More Vulnerable to SARS-CoV-2 and Poor Outcomes: A Pan-Cancer Bioinformatics Analysis
Source: Front Immunol. 2022 Jan 10;12:804387. doi: 10.3389/fimmu.2021.804387 (PMC8784815; doi:10.3389/fimmu.2021.804387)
Supplement: Supplementary Table 12 — Upstream regulators of SARS-CoV-2-required genes. [file Table_12.xls]

## Sheet: all miRNA
miRNAid	miRNAname	geneName	PITA	RNA22	miRmap	microT	miRanda	PicTar	TargetScan	pancancerNum
MIMAT0000086	hsa-miR-29a-3p	ACE2	1	0	0	0	0	0	0	3
MIMAT0000100	hsa-miR-29b-3p	ACE2	1	0	0	0	0	0	0	6
MIMAT0000435	hsa-miR-143-3p	ACE2	1	0	0	0	0	0	0	3
MIMAT0000450	hsa-miR-149-5p	ACE2	0	0	0	0	1	0	0	7
MIMAT0000681	hsa-miR-29c-3p	ACE2	1	0	0	0	0	0	0	3
MIMAT0002814	hsa-miR-432-5p	ACE2	1	0	0	0	0	0	0	7
MIMAT0003267	hsa-miR-599	ACE2	1	0	0	0	0	0	0	3
MIMAT0003328	hsa-miR-653-5p	ACE2	1	0	0	0	0	0	0	8
MIMAT0004957	hsa-miR-760	ACE2	1	0	0	0	0	0	0	6
MIMAT0004985	hsa-miR-942-5p	ACE2	0	0	0	1	0	0	0	3
MIMAT0005903	hsa-miR-1251-5p	ACE2	1	0	0	0	0	0	0	4
MIMAT0022695	hsa-miR-212-5p	ACE2	0	0	1	0	0	0	0	5
MIMAT0000084	hsa-miR-27a-3p	ATP6AP1	1	0	0	0	0	0	0	12
MIMAT0000086	hsa-miR-29a-3p	ATP6AP1	1	0	0	0	0	0	0	5
MIMAT0000098	hsa-miR-100-5p	ATP6AP1	1	0	0	0	0	0	0	12
MIMAT0000099	hsa-miR-101-3p	ATP6AP1	1	0	0	0	0	0	0	5
MIMAT0000100	hsa-miR-29b-3p	ATP6AP1	1	0	0	0	0	0	0	2
MIMAT0000227	hsa-miR-197-3p	ATP6AP1	1	0	0	0	0	0	0	7
MIMAT0000231	hsa-miR-199a-5p	ATP6AP1	1	0	0	0	0	0	0	9
MIMAT0000243	hsa-miR-148a-3p	ATP6AP1	1	0	0	0	0	0	0	5
MIMAT0000253	hsa-miR-10a-5p	ATP6AP1	1	0	0	0	0	0	0	4
MIMAT0000254	hsa-miR-10b-5p	ATP6AP1	1	0	0	0	0	0	0	3
MIMAT0000263	hsa-miR-199b-5p	ATP6AP1	1	0	0	0	0	0	0	7
MIMAT0000265	hsa-miR-204-5p	ATP6AP1	1	0	0	0	0	0	0	7
MIMAT0000265	hsa-miR-204-5p	ATP6AP1	1	0	0	0	0	0	0	7
MIMAT0000268	hsa-miR-211-5p	ATP6AP1	1	0	0	0	0	0	0	5
MIMAT0000268	hsa-miR-211-5p	ATP6AP1	1	0	0	0	0	0	0	5
MIMAT0000278	hsa-miR-221-3p	ATP6AP1	1	0	0	0	0	0	0	8
MIMAT0000279	hsa-miR-222-3p	ATP6AP1	1	0	0	0	0	0	0	9
MIMAT0000419	hsa-miR-27b-3p	ATP6AP1	1	0	0	0	0	0	0	8
MIMAT0000427	hsa-miR-133a-3p	ATP6AP1	1	0	0	0	0	0	0	7
MIMAT0000430	hsa-miR-138-5p	ATP6AP1	1	0	0	0	0	0	0	4
MIMAT0000435	hsa-miR-143-3p	ATP6AP1	1	0	0	0	0	0	0	8
MIMAT0000437	hsa-miR-145-5p	ATP6AP1	1	0	0	0	0	0	0	8
MIMAT0000438	hsa-miR-152-3p	ATP6AP1	1	0	0	0	0	0	0	7
MIMAT0000451	hsa-miR-150-5p	ATP6AP1	1	0	1	0	1	0	0	13
MIMAT0000455	hsa-miR-185-5p	ATP6AP1	1	0	1	0	1	0	0	2
MIMAT0000510	hsa-miR-320a	ATP6AP1	1	0	0	0	0	0	0	6
MIMAT0000681	hsa-miR-29c-3p	ATP6AP1	1	0	0	0	0	0	0	5
MIMAT0000690	hsa-miR-296-5p	ATP6AP1	1	0	0	0	0	0	0	11
MIMAT0000751	hsa-miR-330-3p	ATP6AP1	0	0	0	1	0	0	0	4
MIMAT0000753	hsa-miR-342-3p	ATP6AP1	1	0	0	0	0	0	0	8
MIMAT0000759	hsa-miR-148b-3p	ATP6AP1	1	0	0	0	0	0	0	3
MIMAT0000762	hsa-miR-324-3p	ATP6AP1	1	0	0	0	0	0	0	2
MIMAT0000770	hsa-miR-133b	ATP6AP1	1	0	0	0	0	0	0	6
MIMAT0002173	hsa-miR-483-3p	ATP6AP1	1	0	0	0	0	0	0	6
MIMAT0002173	hsa-miR-483-3p	ATP6AP1	1	0	0	0	0	0	0	6
MIMAT0002175	hsa-miR-485-5p	ATP6AP1	0	0	0	1	0	0	0	4
MIMAT0002175	hsa-miR-485-5p	ATP6AP1	0	0	0	1	1	0	0	4
MIMAT0002805	hsa-miR-489-3p	ATP6AP1	0	0	0	1	0	0	0	2
MIMAT0002816	hsa-miR-494-3p	ATP6AP1	1	0	0	1	0	0	0	5
MIMAT0002877	hsa-miR-513a-5p	ATP6AP1	1	0	0	0	0	0	0	4
MIMAT0002882	hsa-miR-510-5p	ATP6AP1	0	0	0	1	0	0	0	1
MIMAT0002882	hsa-miR-510-5p	ATP6AP1	1	0	1	1	0	0	0	1
MIMAT0003215	hsa-miR-552-3p	ATP6AP1	1	0	0	0	0	0	0	1
MIMAT0003215	hsa-miR-552-3p	ATP6AP1	0	0	0	1	0	0	0	1
MIMAT0003233	hsa-miR-551b-3p	ATP6AP1	0	0	0	1	0	0	0	4
MIMAT0003239	hsa-miR-574-3p	ATP6AP1	1	0	0	0	0	0	0	3
MIMAT0003321	hsa-miR-651-5p	ATP6AP1	1	0	0	0	0	0	0	3
MIMAT0003326	hsa-miR-663a	ATP6AP1	1	0	0	0	0	0	0	2
MIMAT0003330	hsa-miR-654-5p	ATP6AP1	1	0	0	0	0	0	0	5
MIMAT0003880	hsa-miR-671-5p	ATP6AP1	1	0	0	0	0	0	0	1
MIMAT0003880	hsa-miR-671-5p	ATP6AP1	1	0	0	0	0	0	0	1
MIMAT0003948	hsa-miR-770-5p	ATP6AP1	1	0	0	0	0	0	0	6
MIMAT0004605	hsa-miR-129-2-3p	ATP6AP1	1	0	0	0	0	0	0	5
MIMAT0004748	hsa-miR-423-5p	ATP6AP1	1	0	0	0	0	0	0	5
MIMAT0004780	hsa-miR-532-3p	ATP6AP1	1	0	0	0	0	0	0	3
MIMAT0004784	hsa-miR-455-3p	ATP6AP1	1	0	0	0	0	0	0	12
MIMAT0004920	hsa-miR-541-3p	ATP6AP1	1	0	0	0	0	0	0	3
MIMAT0004985	hsa-miR-942-5p	ATP6AP1	1	0	0	0	0	0	0	11
MIMAT0005792	hsa-miR-320b	ATP6AP1	1	0	0	0	0	0	0	9
MIMAT0005793	hsa-miR-320c	ATP6AP1	1	0	0	0	0	0	0	10
MIMAT0005824	hsa-miR-1179	ATP6AP1	1	0	0	0	0	0	0	5
MIMAT0005877	hsa-miR-1286	ATP6AP1	1	0	1	0	0	0	0	3
MIMAT0005944	hsa-miR-1252-5p	ATP6AP1	1	0	0	0	0	0	0	0
MIMAT0005944	hsa-miR-1252-5p	ATP6AP1	0	0	0	1	0	0	0	0
MIMAT0005944	hsa-miR-1252-5p	ATP6AP1	0	0	0	1	0	0	0	0
MIMAT0005944	hsa-miR-1252-5p	ATP6AP1	1	0	0	1	0	0	0	0
MIMAT0005952	hsa-miR-1321	ATP6AP1	0	0	0	1	0	0	0	0
MIMAT0005952	hsa-miR-1321	ATP6AP1	0	0	0	1	0	0	0	0
MIMAT0005952	hsa-miR-1321	ATP6AP1	1	0	0	1	0	0	0	0
MIMAT0005952	hsa-miR-1321	ATP6AP1	1	0	0	1	0	0	0	0
MIMAT0005955	hsa-miR-1197	ATP6AP1	1	0	0	0	0	0	0	1
MIMAT0006764	hsa-miR-320d	ATP6AP1	1	0	0	0	0	0	0	7
MIMAT0014989	hsa-miR-3126-5p	ATP6AP1	0	0	1	0	0	0	0	0
MIMAT0014989	hsa-miR-3126-5p	ATP6AP1	0	0	1	0	0	0	0	0
MIMAT0014989	hsa-miR-3126-5p	ATP6AP1	0	0	1	0	0	0	0	0
MIMAT0016858	hsa-miR-4306	ATP6AP1	0	0	1	0	0	0	0	0
MIMAT0017981	hsa-miR-3605-5p	ATP6AP1	0	0	0	1	0	0	0	4
MIMAT0017981	hsa-miR-3605-5p	ATP6AP1	0	0	0	1	0	0	0	4
MIMAT0018943	hsa-miR-4428	ATP6AP1	0	0	0	2	0	0	0	2
MIMAT0018943	hsa-miR-4428	ATP6AP1	0	0	0	1	0	0	0	2
MIMAT0018943	hsa-miR-4428	ATP6AP1	0	0	1	2	0	0	0	2
MIMAT0018943	hsa-miR-4428	ATP6AP1	0	0	1	0	0	0	0	2
MIMAT0018943	hsa-miR-4428	ATP6AP1	0	0	1	1	0	0	0	2
MIMAT0019704	hsa-miR-4644	ATP6AP1	0	0	1	0	0	0	0	1
MIMAT0019864	hsa-miR-3064-5p	ATP6AP1	0	0	0	1	0	0	0	0
MIMAT0019864	hsa-miR-3064-5p	ATP6AP1	0	0	0	1	0	0	0	0
MIMAT0019868	hsa-miR-4739	ATP6AP1	0	0	0	1	0	0	0	1
MIMAT0019868	hsa-miR-4739	ATP6AP1	0	0	0	1	0	0	0	1
MIMAT0019868	hsa-miR-4739	ATP6AP1	0	0	0	1	0	0	0	1
MIMAT0019868	hsa-miR-4739	ATP6AP1	0	0	1	1	0	0	0	1
MIMAT0019868	hsa-miR-4739	ATP6AP1	0	0	1	1	0	0	0	1
MIMAT0019899	hsa-miR-4756-5p	ATP6AP1	0	0	0	1	0	0	0	1
MIMAT0019899	hsa-miR-4756-5p	ATP6AP1	0	0	0	1	0	0	0	1
MIMAT0019899	hsa-miR-4756-5p	ATP6AP1	0	0	0	1	0	0	0	1
MIMAT0019899	hsa-miR-4756-5p	ATP6AP1	0	0	1	1	0	0	0	1
MIMAT0019899	hsa-miR-4756-5p	ATP6AP1	0	0	1	1	0	0	0	1
MIMAT0022726	hsa-miR-1306-5p	ATP6AP1	0	0	0	1	0	0	0	4
MIMAT0027578	hsa-miR-6838-5p	ATP6AP1	0	0	0	0	0	0	1	0
MIMAT0000072	hsa-miR-18a-5p	ATP6V1A	1	0	0	0	1	0	0	19
MIMAT0000073	hsa-miR-19a-3p	ATP6V1A	1	0	0	0	0	0	0	15
MIMAT0000074	hsa-miR-19b-3p	ATP6V1A	1	0	0	0	0	0	0	16
MIMAT0000076	hsa-miR-21-5p	ATP6V1A	1	0	0	0	0	0	0	5
MIMAT0000076	hsa-miR-21-5p	ATP6V1A	1	0	0	0	0	0	0	5
MIMAT0000077	hsa-miR-22-3p	ATP6V1A	1	0	1	1	0	0	0	2
MIMAT0000077	hsa-miR-22-3p	ATP6V1A	1	0	1	1	1	0	0	2
MIMAT0000080	hsa-miR-24-3p	ATP6V1A	1	0	0	0	0	0	0	7
MIMAT0000081	hsa-miR-25-3p	ATP6V1A	1	0	0	0	0	0	0	9
MIMAT0000081	hsa-miR-25-3p	ATP6V1A	1	0	0	0	0	0	0	9
MIMAT0000082	hsa-miR-26a-5p	ATP6V1A	1	0	0	0	0	0	0	6
MIMAT0000082	hsa-miR-26a-5p	ATP6V1A	1	0	0	0	0	0	0	6
MIMAT0000083	hsa-miR-26b-5p	ATP6V1A	1	0	0	0	0	0	0	13
MIMAT0000083	hsa-miR-26b-5p	ATP6V1A	1	0	0	0	0	0	0	13
MIMAT0000084	hsa-miR-27a-3p	ATP6V1A	1	0	1	0	1	1	1	12
MIMAT0000084	hsa-miR-27a-3p	ATP6V1A	1	0	1	1	1	0	0	12
MIMAT0000085	hsa-miR-28-5p	ATP6V1A	1	0	1	0	1	0	0	9
MIMAT0000086	hsa-miR-29a-3p	ATP6V1A	1	0	1	1	1	0	1	7
MIMAT0000090	hsa-miR-32-5p	ATP6V1A	1	0	0	0	0	0	0	11
MIMAT0000090	hsa-miR-32-5p	ATP6V1A	1	0	0	0	0	0	0	11
MIMAT0000092	hsa-miR-92a-3p	ATP6V1A	1	0	0	0	0	0	0	11
MIMAT0000092	hsa-miR-92a-3p	ATP6V1A	1	0	0	0	0	0	0	11
MIMAT0000099	hsa-miR-101-3p	ATP6V1A	1	0	0	1	0	0	0	4
MIMAT0000100	hsa-miR-29b-3p	ATP6V1A	1	0	1	1	1	0	1	8
MIMAT0000226	hsa-miR-196a-5p	ATP6V1A	1	0	1	0	1	0	0	8
MIMAT0000227	hsa-miR-197-3p	ATP6V1A	0	0	0	1	0	0	0	9
MIMAT0000227	hsa-miR-197-3p	ATP6V1A	1	0	1	1	1	1	0	9
MIMAT0000231	hsa-miR-199a-5p	ATP6V1A	1	0	0	0	0	0	0	6
MIMAT0000232	hsa-miR-199a-3p	ATP6V1A	1	0	1	1	0	0	0	8
MIMAT0000232	hsa-miR-199a-3p	ATP6V1A	1	0	1	1	0	1	0	8
MIMAT0000232	hsa-miR-199a-3p	ATP6V1A	1	0	1	1	0	0	0	8
MIMAT0000241	hsa-miR-208a-3p	ATP6V1A	1	0	1	0	0	0	0	2
MIMAT0000241	hsa-miR-208a-3p	ATP6V1A	1	0	1	0	0	0	0	2
MIMAT0000242	hsa-miR-129-5p	ATP6V1A	0	0	0	1	0	0	0	2
MIMAT0000242	hsa-miR-129-5p	ATP6V1A	1	0	0	1	0	0	0	2
MIMAT0000242	hsa-miR-129-5p	ATP6V1A	1	0	0	1	0	0	0	2
MIMAT0000251	hsa-miR-147a	ATP6V1A	1	0	1	0	0	0	0	0
MIMAT0000252	hsa-miR-7-5p	ATP6V1A	1	0	0	0	0	0	0	3
MIMAT0000255	hsa-miR-34a-5p	ATP6V1A	0	1	0	0	0	0	0	4
MIMAT0000256	hsa-miR-181a-5p	ATP6V1A	1	0	1	0	0	0	0	8
MIMAT0000256	hsa-miR-181a-5p	ATP6V1A	1	0	1	0	0	0	0	8
MIMAT0000256	hsa-miR-181a-5p	ATP6V1A	1	0	1	0	1	0	0	8
MIMAT0000257	hsa-miR-181b-5p	ATP6V1A	1	0	1	0	0	0	0	9
MIMAT0000257	hsa-miR-181b-5p	ATP6V1A	1	0	1	0	0	0	0	9
MIMAT0000257	hsa-miR-181b-5p	ATP6V1A	1	0	1	0	1	0	0	9
MIMAT0000258	hsa-miR-181c-5p	ATP6V1A	1	0	1	0	0	0	0	10
MIMAT0000258	hsa-miR-181c-5p	ATP6V1A	1	0	1	0	0	0	0	10
MIMAT0000258	hsa-miR-181c-5p	ATP6V1A	1	0	1	0	1	0	0	10
MIMAT0000263	hsa-miR-199b-5p	ATP6V1A	1	0	0	0	0	0	0	10
MIMAT0000266	hsa-miR-205-5p	ATP6V1A	1	0	0	0	0	0	0	5
MIMAT0000271	hsa-miR-214-3p	ATP6V1A	1	0	0	0	0	0	0	16
MIMAT0000273	hsa-miR-216a-5p	ATP6V1A	1	0	0	0	1	0	0	3
MIMAT0000274	hsa-miR-217	ATP6V1A	1	0	1	1	0	0	0	7
MIMAT0000274	hsa-miR-217	ATP6V1A	1	0	1	1	1	1	1	7
MIMAT0000276	hsa-miR-219a-5p	ATP6V1A	1	0	0	0	0	0	0	8
MIMAT0000276	hsa-miR-219a-5p	ATP6V1A	1	0	0	0	0	0	0	8
MIMAT0000318	hsa-miR-200b-3p	ATP6V1A	1	0	0	0	0	0	0	4
MIMAT0000416	hsa-miR-1-3p	ATP6V1A	1	0	1	1	1	1	1	5
MIMAT0000419	hsa-miR-27b-3p	ATP6V1A	1	0	1	0	1	1	1	11
MIMAT0000419	hsa-miR-27b-3p	ATP6V1A	1	0	1	1	1	0	0	11
MIMAT0000424	hsa-miR-128-3p	ATP6V1A	1	0	0	0	0	1	0	6
MIMAT0000427	hsa-miR-133a-3p	ATP6V1A	1	0	1	1	0	0	0	8
MIMAT0000427	hsa-miR-133a-3p	ATP6V1A	1	0	1	1	0	0	0	8
MIMAT0000427	hsa-miR-133a-3p	ATP6V1A	1	0	1	1	1	0	0	8
MIMAT0000430	hsa-miR-138-5p	ATP6V1A	1	0	0	0	0	0	0	5
MIMAT0000430	hsa-miR-138-5p	ATP6V1A	1	0	0	0	0	1	0	5
MIMAT0000432	hsa-miR-141-3p	ATP6V1A	1	0	0	1	0	0	0	5
MIMAT0000432	hsa-miR-141-3p	ATP6V1A	1	0	0	1	1	1	1	5
MIMAT0000433	hsa-miR-142-5p	ATP6V1A	1	0	0	1	0	0	0	4
MIMAT0000433	hsa-miR-142-5p	ATP6V1A	1	0	0	1	0	0	0	4
MIMAT0000433	hsa-miR-142-5p	ATP6V1A	1	0	0	1	0	0	0	4
MIMAT0000434	hsa-miR-142-3p	ATP6V1A	1	0	1	0	1	0	0	4
MIMAT0000434	hsa-miR-142-3p	ATP6V1A	1	0	1	0	1	0	0	4
MIMAT0000435	hsa-miR-143-3p	ATP6V1A	1	0	1	1	1	1	1	7
MIMAT0000435	hsa-miR-143-3p	ATP6V1A	1	0	1	1	1	0	0	7
MIMAT0000436	hsa-miR-144-3p	ATP6V1A	1	0	0	1	0	0	0	0
MIMAT0000439	hsa-miR-153-3p	ATP6V1A	0	0	0	1	0	0	0	3
MIMAT0000439	hsa-miR-153-3p	ATP6V1A	1	0	0	0	0	0	0	3
MIMAT0000439	hsa-miR-153-3p	ATP6V1A	1	0	0	1	0	0	0	3
MIMAT0000441	hsa-miR-9-5p	ATP6V1A	1	0	0	0	0	0	0	4
MIMAT0000444	hsa-miR-126-5p	ATP6V1A	0	0	0	0	0	2	0	3
MIMAT0000450	hsa-miR-149-5p	ATP6V1A	1	0	0	0	0	0	0	10
MIMAT0000452	hsa-miR-154-5p	ATP6V1A	1	0	0	0	0	0	0	8
MIMAT0000456	hsa-miR-186-5p	ATP6V1A	1	0	0	0	0	0	0	8
MIMAT0000456	hsa-miR-186-5p	ATP6V1A	1	0	0	0	0	0	0	8
MIMAT0000456	hsa-miR-186-5p	ATP6V1A	1	0	0	0	0	0	0	8
MIMAT0000459	hsa-miR-193a-3p	ATP6V1A	1	0	0	0	0	0	0	9
MIMAT0000460	hsa-miR-194-5p	ATP6V1A	1	0	0	0	1	0	0	4
MIMAT0000462	hsa-miR-206	ATP6V1A	1	0	1	1	1	1	1	2
MIMAT0000510	hsa-miR-320a	ATP6V1A	1	0	1	0	1	1	0	18
MIMAT0000617	hsa-miR-200c-3p	ATP6V1A	1	0	0	0	0	0	0	2
MIMAT0000646	hsa-miR-155-5p	ATP6V1A	1	0	0	0	0	0	0	6
MIMAT0000681	hsa-miR-29c-3p	ATP6V1A	1	0	1	1	1	0	1	7
MIMAT0000682	hsa-miR-200a-3p	ATP6V1A	1	0	0	1	0	0	0	3
MIMAT0000682	hsa-miR-200a-3p	ATP6V1A	1	0	0	1	1	1	1	3
MIMAT0000686	hsa-miR-34c-5p	ATP6V1A	0	1	0	0	0	0	0	8
MIMAT0000703	hsa-miR-361-5p	ATP6V1A	1	0	0	0	0	0	0	6
MIMAT0000703	hsa-miR-361-5p	ATP6V1A	1	0	0	0	0	0	0	6
MIMAT0000705	hsa-miR-362-5p	ATP6V1A	1	0	0	0	0	0	0	6
MIMAT0000707	hsa-miR-363-3p	ATP6V1A	1	0	0	0	0	0	0	5
MIMAT0000707	hsa-miR-363-3p	ATP6V1A	1	0	0	0	0	0	0	5
MIMAT0000710	hsa-miR-365a-3p	ATP6V1A	1	0	0	0	0	0	0	9
MIMAT0000719	hsa-miR-367-3p	ATP6V1A	1	1	0	0	0	0	0	1
MIMAT0000719	hsa-miR-367-3p	ATP6V1A	1	0	0	0	0	0	0	1
MIMAT0000720	hsa-miR-376c-3p	ATP6V1A	1	0	0	0	0	0	0	10
MIMAT0000720	hsa-miR-376c-3p	ATP6V1A	1	0	0	0	0	0	0	10
MIMAT0000721	hsa-miR-369-3p	ATP6V1A	1	0	0	0	0	0	0	8
MIMAT0000721	hsa-miR-369-3p	ATP6V1A	2	0	0	0	0	0	0	8
MIMAT0000730	hsa-miR-377-3p	ATP6V1A	1	0	0	0	0	0	0	11
MIMAT0000730	hsa-miR-377-3p	ATP6V1A	1	0	0	0	1	0	0	11
MIMAT0000735	hsa-miR-380-3p	ATP6V1A	1	0	0	0	0	0	0	10
MIMAT0000735	hsa-miR-380-3p	ATP6V1A	1	0	0	0	0	0	0	10
MIMAT0000736	hsa-miR-381-3p	ATP6V1A	1	0	0	1	1	0	0	7
MIMAT0000736	hsa-miR-381-3p	ATP6V1A	1	0	0	1	0	0	0	7
MIMAT0000737	hsa-miR-382-5p	ATP6V1A	1	0	0	0	1	0	0	6
MIMAT0000751	hsa-miR-330-3p	ATP6V1A	1	0	0	1	0	0	0	3
MIMAT0000751	hsa-miR-330-3p	ATP6V1A	1	0	0	1	0	0	0	3
MIMAT0000752	hsa-miR-328-3p	ATP6V1A	1	0	0	0	0	0	0	3
MIMAT0000753	hsa-miR-342-3p	ATP6V1A	1	0	0	0	0	0	0	9
MIMAT0000754	hsa-miR-337-3p	ATP6V1A	1	0	0	0	0	0	0	8
MIMAT0000755	hsa-miR-323a-3p	ATP6V1A	1	0	0	0	0	0	0	4
MIMAT0000756	hsa-miR-326	ATP6V1A	1	0	1	0	0	0	0	4
MIMAT0000756	hsa-miR-326	ATP6V1A	1	0	1	0	0	0	0	4
MIMAT0000762	hsa-miR-324-3p	ATP6V1A	1	0	0	0	0	0	0	1
MIMAT0000763	hsa-miR-338-3p	ATP6V1A	1	0	0	0	0	0	0	6
MIMAT0000763	hsa-miR-338-3p	ATP6V1A	1	0	0	0	0	0	0	6
MIMAT0000765	hsa-miR-335-5p	ATP6V1A	1	0	1	0	0	0	0	9
MIMAT0000765	hsa-miR-335-5p	ATP6V1A	1	0	1	0	0	0	0	9
MIMAT0000770	hsa-miR-133b	ATP6V1A	1	0	1	1	0	0	0	5
MIMAT0000770	hsa-miR-133b	ATP6V1A	1	0	1	1	0	0	0	5
MIMAT0000770	hsa-miR-133b	ATP6V1A	1	0	1	1	1	0	0	5
MIMAT0000771	hsa-miR-325	ATP6V1A	1	1	0	0	0	0	0	0
MIMAT0001075	hsa-miR-384	ATP6V1A	1	0	1	0	1	0	0	0
MIMAT0001075	hsa-miR-384	ATP6V1A	1	0	1	0	0	0	0	0
MIMAT0001080	hsa-miR-196b-5p	ATP6V1A	1	0	1	0	1	0	0	6
MIMAT0001412	hsa-miR-18b-5p	ATP6V1A	1	0	0	0	1	0	0	7
MIMAT0001532	hsa-miR-448	ATP6V1A	1	0	0	0	0	0	0	1
MIMAT0001532	hsa-miR-448	ATP6V1A	1	0	0	0	0	0	0	1
MIMAT0001536	hsa-miR-429	ATP6V1A	1	0	0	0	0	0	0	5
MIMAT0001541	hsa-miR-449a	ATP6V1A	0	1	0	0	0	0	0	2
MIMAT0001629	hsa-miR-329-3p	ATP6V1A	1	0	1	1	0	0	0	11
MIMAT0001629	hsa-miR-329-3p	ATP6V1A	1	0	1	1	0	0	0	11
MIMAT0001635	hsa-miR-452-5p	ATP6V1A	1	0	0	0	0	0	0	6
MIMAT0001639	hsa-miR-409-3p	ATP6V1A	1	0	0	1	0	0	0	4
MIMAT0001639	hsa-miR-409-3p	ATP6V1A	1	0	0	1	0	0	0	4
MIMAT0001639	hsa-miR-409-3p	ATP6V1A	1	0	0	1	0	0	0	4
MIMAT0002171	hsa-miR-410-3p	ATP6V1A	1	0	0	0	0	0	0	4
MIMAT0002173	hsa-miR-483-3p	ATP6V1A	1	0	0	0	0	0	0	4
MIMAT0002173	hsa-miR-483-3p	ATP6V1A	1	0	0	0	0	0	0	4
MIMAT0002176	hsa-miR-485-3p	ATP6V1A	1	0	0	0	0	0	0	8
MIMAT0002176	hsa-miR-485-3p	ATP6V1A	1	0	0	0	0	0	0	8
MIMAT0002177	hsa-miR-486-5p	ATP6V1A	1	0	0	0	0	0	0	2
MIMAT0002178	hsa-miR-487a-3p	ATP6V1A	1	0	0	0	0	0	0	11
MIMAT0002805	hsa-miR-489-3p	ATP6V1A	1	0	0	0	0	0	0	9
MIMAT0002806	hsa-miR-490-3p	ATP6V1A	1	0	1	0	1	0	0	6
MIMAT0002816	hsa-miR-494-3p	ATP6V1A	1	0	0	0	0	0	0	8
MIMAT0002817	hsa-miR-495-3p	ATP6V1A	1	0	1	1	0	0	0	9
MIMAT0002817	hsa-miR-495-3p	ATP6V1A	1	0	1	1	1	0	0	9
MIMAT0002817	hsa-miR-495-3p	ATP6V1A	1	0	1	1	0	0	0	9
MIMAT0002817	hsa-miR-495-3p	ATP6V1A	1	0	1	1	1	0	0	9
MIMAT0002817	hsa-miR-495-3p	ATP6V1A	1	0	1	2	0	0	0	9
MIMAT0002817	hsa-miR-495-3p	ATP6V1A	1	0	1	0	0	0	0	9
MIMAT0002818	hsa-miR-496	ATP6V1A	1	0	1	0	0	0	0	3
MIMAT0002818	hsa-miR-496	ATP6V1A	1	0	1	0	0	0	0	3
MIMAT0002819	hsa-miR-193b-3p	ATP6V1A	1	0	0	0	0	0	0	7
MIMAT0002821	hsa-miR-181d-5p	ATP6V1A	1	0	1	0	0	0	0	11
MIMAT0002821	hsa-miR-181d-5p	ATP6V1A	1	0	1	0	0	0	0	11
MIMAT0002821	hsa-miR-181d-5p	ATP6V1A	1	0	1	0	1	0	0	11
MIMAT0002835	hsa-miR-526b-5p	ATP6V1A	1	0	0	0	0	0	0	2
MIMAT0002849	hsa-miR-524-5p	ATP6V1A	1	0	0	0	0	0	0	2
MIMAT0002855	hsa-miR-520d-5p	ATP6V1A	1	0	0	0	0	0	0	3
MIMAT0002858	hsa-miR-520g-3p	ATP6V1A	1	0	0	0	0	0	0	2
MIMAT0002858	hsa-miR-520g-3p	ATP6V1A	1	0	0	0	0	0	0	2
MIMAT0002867	hsa-miR-520h	ATP6V1A	1	0	0	0	0	0	0	3
MIMAT0002867	hsa-miR-520h	ATP6V1A	1	0	0	0	0	0	0	3
MIMAT0002870	hsa-miR-499a-5p	ATP6V1A	1	0	1	0	0	0	0	5
MIMAT0002870	hsa-miR-499a-5p	ATP6V1A	1	0	1	0	0	0	0	5
MIMAT0002877	hsa-miR-513a-5p	ATP6V1A	1	0	1	0	0	0	0	1
MIMAT0002877	hsa-miR-513a-5p	ATP6V1A	1	0	1	1	0	0	0	1
MIMAT0002880	hsa-miR-508-3p	ATP6V1A	1	0	0	0	0	0	0	2
MIMAT0002880	hsa-miR-508-3p	ATP6V1A	1	0	0	0	0	0	0	2
MIMAT0002881	hsa-miR-509-3p	ATP6V1A	1	0	0	0	0	0	0	2
MIMAT0002890	hsa-miR-299-5p	ATP6V1A	1	0	0	0	0	0	0	7
MIMAT0003215	hsa-miR-552-3p	ATP6V1A	1	0	1	0	0	0	0	3
MIMAT0003218	hsa-miR-92b-3p	ATP6V1A	1	0	0	0	0	0	0	7
MIMAT0003218	hsa-miR-92b-3p	ATP6V1A	1	0	0	0	0	0	0	7
MIMAT0003220	hsa-miR-556-5p	ATP6V1A	1	0	0	1	0	0	0	4
MIMAT0003242	hsa-miR-577	ATP6V1A	1	0	0	0	0	0	0	3
MIMAT0003244	hsa-miR-579-3p	ATP6V1A	1	0	0	0	0	0	0	7
MIMAT0003244	hsa-miR-579-3p	ATP6V1A	1	0	0	0	0	0	0	7
MIMAT0003245	hsa-miR-580-3p	ATP6V1A	1	0	0	0	0	0	0	3
MIMAT0003245	hsa-miR-580-3p	ATP6V1A	1	0	0	0	0	0	0	3
MIMAT0003247	hsa-miR-582-5p	ATP6V1A	1	0	1	0	0	0	0	4
MIMAT0003247	hsa-miR-582-5p	ATP6V1A	1	0	1	0	0	0	0	4
MIMAT0003255	hsa-miR-588	ATP6V1A	1	0	0	0	0	0	0	2
MIMAT0003258	hsa-miR-590-5p	ATP6V1A	1	0	0	0	0	0	0	11
MIMAT0003258	hsa-miR-590-5p	ATP6V1A	1	0	0	0	0	0	0	11
MIMAT0003281	hsa-miR-613	ATP6V1A	1	0	1	1	1	1	1	0
MIMAT0003294	hsa-miR-625-5p	ATP6V1A	1	1	1	0	0	0	0	5
MIMAT0003296	hsa-miR-627-5p	ATP6V1A	1	0	0	0	0	0	0	6
MIMAT0003311	hsa-miR-641	ATP6V1A	1	0	0	0	0	0	0	6
MIMAT0003320	hsa-miR-650	ATP6V1A	1	0	1	1	0	0	0	0
MIMAT0003320	hsa-miR-650	ATP6V1A	0	0	0	1	0	0	0	0
MIMAT0003320	hsa-miR-650	ATP6V1A	1	0	1	1	0	0	0	0
MIMAT0003320	hsa-miR-650	ATP6V1A	1	0	1	1	0	1	0	0
MIMAT0003321	hsa-miR-651-5p	ATP6V1A	1	0	0	0	0	0	0	4
MIMAT0003321	hsa-miR-651-5p	ATP6V1A	1	0	0	0	0	0	0	4
MIMAT0003327	hsa-miR-449b-5p	ATP6V1A	0	1	0	0	0	0	0	1
MIMAT0003329	hsa-miR-411-5p	ATP6V1A	1	0	0	0	0	0	0	7
MIMAT0003330	hsa-miR-654-5p	ATP6V1A	1	0	1	0	0	0	0	4
MIMAT0003332	hsa-miR-656-3p	ATP6V1A	1	0	0	0	0	0	0	12
MIMAT0003339	hsa-miR-421	ATP6V1A	1	0	1	0	0	0	0	7
MIMAT0003339	hsa-miR-421	ATP6V1A	1	0	1	0	0	0	0	7
MIMAT0003339	hsa-miR-421	ATP6V1A	1	0	1	0	0	0	0	7
MIMAT0003389	hsa-miR-542-3p	ATP6V1A	1	0	0	0	0	0	0	8
MIMAT0003880	hsa-miR-671-5p	ATP6V1A	1	0	1	0	0	0	0	7
MIMAT0003880	hsa-miR-671-5p	ATP6V1A	1	0	1	0	0	1	0	7
MIMAT0004502	hsa-miR-28-3p	ATP6V1A	1	0	0	0	0	0	0	11
MIMAT0004563	hsa-miR-199b-3p	ATP6V1A	1	0	1	1	0	0	0	8
MIMAT0004563	hsa-miR-199b-3p	ATP6V1A	1	0	1	1	0	1	0	8
MIMAT0004563	hsa-miR-199b-3p	ATP6V1A	1	0	1	1	0	0	0	8
MIMAT0004597	hsa-miR-140-3p	ATP6V1A	1	0	0	0	0	0	0	5
MIMAT0004679	hsa-miR-296-3p	ATP6V1A	1	0	0	0	0	0	0	3
MIMAT0004683	hsa-miR-362-3p	ATP6V1A	1	0	0	1	0	0	0	7
MIMAT0004683	hsa-miR-362-3p	ATP6V1A	1	0	0	1	0	0	0	7
MIMAT0004687	hsa-miR-371a-5p	ATP6V1A	1	0	0	0	0	0	0	1
MIMAT0004687	hsa-miR-371a-5p	ATP6V1A	1	0	0	0	0	0	0	1
MIMAT0004693	hsa-miR-330-5p	ATP6V1A	0	1	0	0	0	0	0	4
MIMAT0004693	hsa-miR-330-5p	ATP6V1A	1	0	1	0	0	0	0	4
MIMAT0004693	hsa-miR-330-5p	ATP6V1A	1	0	1	0	0	0	0	4
MIMAT0004761	hsa-miR-483-5p	ATP6V1A	1	0	1	0	0	0	0	5
MIMAT0004797	hsa-miR-582-3p	ATP6V1A	1	0	1	0	0	0	0	4
MIMAT0004797	hsa-miR-582-3p	ATP6V1A	1	0	1	0	0	0	0	4
MIMAT0004805	hsa-miR-616-3p	ATP6V1A	1	0	1	0	0	0	0	2
MIMAT0004805	hsa-miR-616-3p	ATP6V1A	1	0	1	0	0	0	0	2
MIMAT0004805	hsa-miR-616-3p	ATP6V1A	1	0	1	0	0	0	0	2
MIMAT0004809	hsa-miR-628-5p	ATP6V1A	1	0	0	0	0	0	0	2
MIMAT0004810	hsa-miR-629-5p	ATP6V1A	1	0	0	0	0	0	0	5
MIMAT0004814	hsa-miR-654-3p	ATP6V1A	1	0	0	0	0	0	0	5
MIMAT0004903	hsa-miR-300	ATP6V1A	1	0	0	1	1	0	0	0
MIMAT0004903	hsa-miR-300	ATP6V1A	1	0	0	1	0	0	0	0
MIMAT0004909	hsa-miR-450b-5p	ATP6V1A	1	0	0	0	0	0	0	7
MIMAT0004919	hsa-miR-541-5p	ATP6V1A	0	0	0	1	0	0	0	1
MIMAT0004920	hsa-miR-541-3p	ATP6V1A	1	0	1	0	0	0	0	3
MIMAT0004921	hsa-miR-889-3p	ATP6V1A	1	0	0	0	0	0	0	4
MIMAT0004922	hsa-miR-875-5p	ATP6V1A	1	0	0	0	0	0	0	1
MIMAT0004926	hsa-miR-708-5p	ATP6V1A	1	0	1	1	1	0	0	11
MIMAT0004952	hsa-miR-665	ATP6V1A	1	0	0	0	0	0	0	7
MIMAT0004953	hsa-miR-873-5p	ATP6V1A	1	0	0	0	0	0	0	5
MIMAT0004953	hsa-miR-873-5p	ATP6V1A	1	0	0	0	0	0	0	5
MIMAT0004954	hsa-miR-543	ATP6V1A	1	0	1	1	0	0	0	12
MIMAT0004954	hsa-miR-543	ATP6V1A	1	0	1	1	1	0	0	12
MIMAT0004954	hsa-miR-543	ATP6V1A	1	0	1	1	1	0	1	12
MIMAT0004959	hsa-miR-216b-5p	ATP6V1A	1	0	0	0	0	0	0	5
MIMAT0004960	hsa-miR-208b-3p	ATP6V1A	1	0	1	0	0	0	0	2
MIMAT0004960	hsa-miR-208b-3p	ATP6V1A	1	0	1	0	0	0	0	2
MIMAT0004985	hsa-miR-942-5p	ATP6V1A	1	0	0	0	0	0	0	2
MIMAT0004987	hsa-miR-944	ATP6V1A	1	0	0	1	0	0	0	1
MIMAT0004987	hsa-miR-944	ATP6V1A	1	0	0	1	0	0	0	1
MIMAT0005458	hsa-miR-1224-5p	ATP6V1A	1	1	0	0	0	0	0	1
MIMAT0005458	hsa-miR-1224-5p	ATP6V1A	1	0	0	0	0	0	0	1
MIMAT0005788	hsa-miR-513b-5p	ATP6V1A	1	0	1	1	0	0	0	0
MIMAT0005788	hsa-miR-513b-5p	ATP6V1A	1	0	1	1	0	0	0	0
MIMAT0005788	hsa-miR-513b-5p	ATP6V1A	1	0	1	1	0	0	0	0
MIMAT0005788	hsa-miR-513b-5p	ATP6V1A	1	0	1	1	0	0	0	0
MIMAT0005788	hsa-miR-513b-5p	ATP6V1A	1	0	1	1	0	0	0	0
MIMAT0005789	hsa-miR-513c-5p	ATP6V1A	1	0	1	0	0	0	0	0
MIMAT0005789	hsa-miR-513c-5p	ATP6V1A	1	0	1	0	0	0	0	0
MIMAT0005789	hsa-miR-513c-5p	ATP6V1A	1	0	1	0	0	0	0	0
MIMAT0005789	hsa-miR-513c-5p	ATP6V1A	1	0	1	0	0	0	0	0
MIMAT0005792	hsa-miR-320b	ATP6V1A	1	0	1	0	1	1	0	16
MIMAT0005793	hsa-miR-320c	ATP6V1A	1	0	0	0	1	1	0	10
MIMAT0005794	hsa-miR-1296-5p	ATP6V1A	1	0	1	1	0	0	0	9
MIMAT0005795	hsa-miR-1323	ATP6V1A	1	0	0	1	0	0	0	3
MIMAT0005795	hsa-miR-1323	ATP6V1A	1	0	0	1	0	0	0	3
MIMAT0005800	hsa-miR-1298-5p	ATP6V1A	1	0	0	0	0	0	0	1
MIMAT0005885	hsa-miR-1295a	ATP6V1A	1	0	0	0	0	0	0	2
MIMAT0005886	hsa-miR-1297	ATP6V1A	1	0	0	0	0	0	0	1
MIMAT0005886	hsa-miR-1297	ATP6V1A	1	0	0	0	0	0	0	1
MIMAT0005919	hsa-miR-548o-3p	ATP6V1A	1	0	0	0	0	0	0	2
MIMAT0005919	hsa-miR-548o-3p	ATP6V1A	1	0	0	0	0	0	0	2
MIMAT0005930	hsa-miR-1276	ATP6V1A	1	0	1	1	0	0	0	4
MIMAT0005930	hsa-miR-1276	ATP6V1A	1	0	1	1	0	0	0	4
MIMAT0005930	hsa-miR-1276	ATP6V1A	1	0	1	1	0	0	0	4
MIMAT0005930	hsa-miR-1276	ATP6V1A	1	0	1	1	0	0	0	4
MIMAT0005930	hsa-miR-1276	ATP6V1A	1	0	1	1	0	0	0	4
MIMAT0005930	hsa-miR-1276	ATP6V1A	0	0	0	1	0	0	0	4
MIMAT0005944	hsa-miR-1252-5p	ATP6V1A	1	0	0	1	0	0	0	2
MIMAT0005952	hsa-miR-1321	ATP6V1A	1	0	1	0	0	0	0	0
MIMAT0005952	hsa-miR-1321	ATP6V1A	1	0	1	0	0	0	0	0
MIMAT0005955	hsa-miR-1197	ATP6V1A	1	0	0	0	0	0	0	4
MIMAT0006764	hsa-miR-320d	ATP6V1A	1	0	0	0	1	1	0	11
MIMAT0007888	hsa-miR-1913	ATP6V1A	0	0	1	0	0	0	0	1
MIMAT0014989	hsa-miR-3126-5p	ATP6V1A	0	0	1	0	0	0	0	2
MIMAT0014989	hsa-miR-3126-5p	ATP6V1A	0	0	1	0	0	0	0	2
MIMAT0014992	hsa-miR-3129-5p	ATP6V1A	0	0	1	1	0	0	0	2
MIMAT0014992	hsa-miR-3129-5p	ATP6V1A	0	0	1	1	0	1	0	2
MIMAT0014992	hsa-miR-3129-5p	ATP6V1A	0	0	1	1	0	0	0	2
MIMAT0015007	hsa-miR-3139	ATP6V1A	0	0	1	1	0	0	0	3
MIMAT0015037	hsa-miR-3163	ATP6V1A	0	0	0	1	0	0	0	0
MIMAT0015037	hsa-miR-3163	ATP6V1A	0	0	1	1	0	0	0	0
MIMAT0015037	hsa-miR-3163	ATP6V1A	0	0	1	0	0	0	0	0
MIMAT0015037	hsa-miR-3163	ATP6V1A	0	0	1	0	0	0	0	0
MIMAT0015037	hsa-miR-3163	ATP6V1A	0	0	1	1	0	0	0	0
MIMAT0015037	hsa-miR-3163	ATP6V1A	0	0	1	1	0	0	0	0
MIMAT0015049	hsa-miR-1193	ATP6V1A	0	0	1	0	0	0	0	1
MIMAT0015049	hsa-miR-1193	ATP6V1A	0	0	1	0	0	0	0	1
MIMAT0015087	hsa-miR-514b-5p	ATP6V1A	0	0	1	0	0	0	0	3
MIMAT0015087	hsa-miR-514b-5p	ATP6V1A	0	0	1	0	0	0	0	3
MIMAT0015087	hsa-miR-514b-5p	ATP6V1A	0	0	1	0	0	0	0	3
MIMAT0015087	hsa-miR-514b-5p	ATP6V1A	0	0	1	0	0	0	0	3
MIMAT0016894	hsa-miR-4262	ATP6V1A	0	0	1	0	0	0	0	0
MIMAT0016894	hsa-miR-4262	ATP6V1A	0	0	1	0	0	0	0	0
MIMAT0016894	hsa-miR-4262	ATP6V1A	0	0	1	0	0	0	0	0
MIMAT0016925	hsa-miR-500b-5p	ATP6V1A	0	0	0	1	0	0	0	9
MIMAT0017989	hsa-miR-3612	ATP6V1A	0	0	1	1	0	0	0	1
MIMAT0017989	hsa-miR-3612	ATP6V1A	0	0	0	1	0	0	0	1
MIMAT0017989	hsa-miR-3612	ATP6V1A	0	0	1	1	0	0	0	1
MIMAT0017989	hsa-miR-3612	ATP6V1A	0	0	1	1	0	1	0	1
MIMAT0018109	hsa-miR-3681-3p	ATP6V1A	0	0	0	0	0	1	0	0
MIMAT0018937	hsa-miR-378g	ATP6V1A	0	1	0	0	0	0	0	0
MIMAT0018937	hsa-miR-378g	ATP6V1A	0	0	1	0	0	0	0	0
MIMAT0018944	hsa-miR-4429	ATP6V1A	0	0	1	0	0	1	0	1
MIMAT0019064	hsa-miR-4525	ATP6V1A	0	1	0	0	0	0	0	0
MIMAT0019864	hsa-miR-3064-5p	ATP6V1A	0	0	1	0	0	0	0	1
MIMAT0019868	hsa-miR-4739	ATP6V1A	0	0	1	0	0	0	0	2
MIMAT0019868	hsa-miR-4739	ATP6V1A	0	0	1	0	0	0	0	2
MIMAT0019899	hsa-miR-4756-5p	ATP6V1A	0	0	1	1	0	0	0	1
MIMAT0019899	hsa-miR-4756-5p	ATP6V1A	0	0	1	0	0	0	0	1
MIMAT0019924	hsa-miR-4770	ATP6V1A	0	0	1	1	0	1	1	2
MIMAT0019924	hsa-miR-4770	ATP6V1A	0	0	1	1	0	0	0	2
MIMAT0021086	hsa-miR-5094	ATP6V1A	0	0	1	1	0	0	0	3
MIMAT0021086	hsa-miR-5094	ATP6V1A	0	0	1	1	0	1	0	3
MIMAT0022300	hsa-miR-5590-3p	ATP6V1A	0	0	0	1	0	0	0	3
MIMAT0022300	hsa-miR-5590-3p	ATP6V1A	0	0	0	1	0	0	0	3
MIMAT0022479	hsa-miR-5688	ATP6V1A	0	0	1	1	0	0	0	0
MIMAT0022479	hsa-miR-5688	ATP6V1A	0	0	1	1	0	0	0	0
MIMAT0022479	hsa-miR-5688	ATP6V1A	0	0	1	1	0	0	0	0
MIMAT0022479	hsa-miR-5688	ATP6V1A	0	0	1	1	0	0	0	0
MIMAT0022479	hsa-miR-5688	ATP6V1A	0	0	1	1	0	0	0	0
MIMAT0022479	hsa-miR-5688	ATP6V1A	0	0	1	1	0	0	0	0
MIMAT0022483	hsa-miR-5691	ATP6V1A	0	0	1	0	0	0	0	4
MIMAT0022483	hsa-miR-5691	ATP6V1A	0	0	1	0	0	0	0	4
MIMAT0022701	hsa-miR-506-5p	ATP6V1A	0	0	1	0	0	0	0	1
MIMAT0022701	hsa-miR-506-5p	ATP6V1A	0	0	1	0	0	0	0	1
MIMAT0022702	hsa-miR-514a-5p	ATP6V1A	0	1	0	0	0	0	0	0
MIMAT0022705	hsa-miR-539-3p	ATP6V1A	0	0	0	1	0	0	0	10
MIMAT0022705	hsa-miR-539-3p	ATP6V1A	0	0	0	1	0	0	0	10
MIMAT0022705	hsa-miR-539-3p	ATP6V1A	0	0	0	1	0	0	0	10
MIMAT0022705	hsa-miR-539-3p	ATP6V1A	0	0	0	1	0	0	0	10
MIMAT0022706	hsa-miR-561-5p	ATP6V1A	0	0	0	1	0	0	0	2
MIMAT0022706	hsa-miR-561-5p	ATP6V1A	0	0	0	1	0	0	0	2
MIMAT0022724	hsa-miR-1277-5p	ATP6V1A	0	0	0	1	0	0	0	1
MIMAT0022724	hsa-miR-1277-5p	ATP6V1A	0	0	0	1	0	0	0	1
MIMAT0022724	hsa-miR-1277-5p	ATP6V1A	0	0	0	1	0	0	0	1
MIMAT0022844	hsa-miR-216a-3p	ATP6V1A	0	0	0	0	0	1	0	2
MIMAT0023713	hsa-miR-6088	ATP6V1A	0	0	1	0	0	1	1	1
MIMAT0023713	hsa-miR-6088	ATP6V1A	0	0	1	0	0	1	0	1
MIMAT0025464	hsa-miR-6504-5p	ATP6V1A	0	0	1	0	0	0	0	0
MIMAT0025475	hsa-miR-6509-3p	ATP6V1A	0	0	1	0	0	0	0	0
MIMAT0025475	hsa-miR-6509-3p	ATP6V1A	0	0	1	0	0	0	0	0
MIMAT0027515	hsa-miR-6807-3p	ATP6V1A	0	0	0	0	0	0	1	1
MIMAT0000068	hsa-miR-15a-5p	CCDC22	0	0	0	0	1	0	0	0
MIMAT0000069	hsa-miR-16-5p	CCDC22	0	0	0	0	1	0	0	3
MIMAT0000086	hsa-miR-29a-3p	CCDC22	1	0	0	0	0	0	0	4
MIMAT0000100	hsa-miR-29b-3p	CCDC22	1	0	0	0	0	0	0	3
MIMAT0000101	hsa-miR-103a-3p	CCDC22	0	0	0	0	1	0	0	1
MIMAT0000104	hsa-miR-107	CCDC22	0	0	0	0	1	0	0	4
MIMAT0000271	hsa-miR-214-3p	CCDC22	1	0	0	0	0	0	0	9
MIMAT0000275	hsa-miR-218-5p	CCDC22	1	0	0	0	0	0	0	2
MIMAT0000457	hsa-miR-188-5p	CCDC22	1	0	0	0	0	0	0	1
MIMAT0000681	hsa-miR-29c-3p	CCDC22	1	0	0	0	0	0	0	4
MIMAT0000732	hsa-miR-378a-3p	CCDC22	1	0	1	0	0	0	0	6
MIMAT0000763	hsa-miR-338-3p	CCDC22	1	0	0	0	0	0	0	2
MIMAT0000773	hsa-miR-346	CCDC22	0	1	0	0	0	0	0	4
MIMAT0001339	hsa-miR-422a	CCDC22	1	0	1	0	0	0	0	1
MIMAT0003150	hsa-miR-455-5p	CCDC22	1	0	0	0	0	0	0	5
MIMAT0003255	hsa-miR-588	CCDC22	1	0	1	0	0	0	0	1
MIMAT0004797	hsa-miR-582-3p	CCDC22	1	0	0	0	0	0	0	6
MIMAT0005794	hsa-miR-1296-5p	CCDC22	1	0	0	0	0	0	0	9
MIMAT0005877	hsa-miR-1286	CCDC22	1	0	0	0	0	0	0	2
MIMAT0014999	hsa-miR-378b	CCDC22	0	0	1	0	0	0	0	1
MIMAT0016847	hsa-miR-378c	CCDC22	0	0	1	0	0	0	0	5
MIMAT0017999	hsa-miR-3619-5p	CCDC22	0	0	1	0	0	0	0	3
MIMAT0018005	hsa-miR-3622b-5p	CCDC22	0	1	0	0	0	0	0	1
MIMAT0018192	hsa-miR-3918	CCDC22	0	1	0	0	0	0	0	0
MIMAT0018926	hsa-miR-378d	CCDC22	0	0	1	0	0	0	0	3
MIMAT0018927	hsa-miR-378e	CCDC22	0	0	1	0	0	0	0	0
MIMAT0018932	hsa-miR-378f	CCDC22	0	0	1	0	0	0	0	2
MIMAT0018984	hsa-miR-378h	CCDC22	0	0	1	0	0	0	0	2
MIMAT0019074	hsa-miR-378i	CCDC22	0	0	1	0	0	0	0	3
MIMAT0019798	hsa-miR-4701-5p	CCDC22	0	0	1	0	0	0	0	4
MIMAT0019909	hsa-miR-4761-3p	CCDC22	0	1	0	0	0	0	0	1
MIMAT0019909	hsa-miR-4761-3p	CCDC22	0	0	1	0	0	0	0	1
MIMAT0022714	hsa-miR-766-5p	CCDC22	0	0	1	0	0	0	0	3
MIMAT0022714	hsa-miR-766-5p	CCDC22	0	0	1	0	0	0	0	3
MIMAT0000070	hsa-miR-17-5p	NPC1	1	0	0	0	1	0	0	8
MIMAT0000075	hsa-miR-20a-5p	NPC1	1	0	0	0	1	0	0	6
MIMAT0000078	hsa-miR-23a-3p	NPC1	1	0	0	0	0	0	0	1
MIMAT0000081	hsa-miR-25-3p	NPC1	1	0	0	0	1	1	1	7
MIMAT0000084	hsa-miR-27a-3p	NPC1	1	0	0	0	0	0	0	0
MIMAT0000084	hsa-miR-27a-3p	NPC1	1	0	0	0	0	0	0	0
MIMAT0000086	hsa-miR-29a-3p	NPC1	1	0	0	0	0	0	0	4
MIMAT0000087	hsa-miR-30a-5p	NPC1	1	0	0	0	0	0	0	9
MIMAT0000090	hsa-miR-32-5p	NPC1	1	0	0	0	1	1	1	7
MIMAT0000091	hsa-miR-33a-5p	NPC1	1	0	1	0	1	1	1	5
MIMAT0000091	hsa-miR-33a-5p	NPC1	1	0	1	0	1	0	1	5
MIMAT0000091	hsa-miR-33a-5p	NPC1	1	0	1	0	0	0	0	5
MIMAT0000092	hsa-miR-92a-3p	NPC1	1	0	0	0	1	1	1	10
MIMAT0000093	hsa-miR-93-5p	NPC1	1	0	0	0	1	0	0	11
MIMAT0000095	hsa-miR-96-5p	NPC1	1	0	0	0	1	0	0	9
MIMAT0000097	hsa-miR-99a-5p	NPC1	1	0	0	0	0	0	0	13
MIMAT0000098	hsa-miR-100-5p	NPC1	1	0	0	0	0	0	0	8
MIMAT0000100	hsa-miR-29b-3p	NPC1	1	0	0	0	0	0	0	7
MIMAT0000101	hsa-miR-103a-3p	NPC1	1	0	0	0	0	0	0	10
MIMAT0000103	hsa-miR-106a-5p	NPC1	1	0	0	0	1	0	0	11
MIMAT0000104	hsa-miR-107	NPC1	1	0	0	0	0	0	0	8
MIMAT0000231	hsa-miR-199a-5p	NPC1	1	0	0	0	0	0	0	6
MIMAT0000243	hsa-miR-148a-3p	NPC1	1	0	1	0	1	0	0	13
MIMAT0000244	hsa-miR-30c-5p	NPC1	1	0	0	0	0	0	0	14
MIMAT0000245	hsa-miR-30d-5p	NPC1	1	0	0	0	0	0	0	10
MIMAT0000256	hsa-miR-181a-5p	NPC1	1	0	0	0	0	0	0	7
MIMAT0000257	hsa-miR-181b-5p	NPC1	1	0	0	0	0	0	0	10
MIMAT0000258	hsa-miR-181c-5p	NPC1	1	0	0	0	0	0	0	9
MIMAT0000259	hsa-miR-182-5p	NPC1	1	0	0	0	0	0	0	11
MIMAT0000263	hsa-miR-199b-5p	NPC1	1	0	0	0	0	0	0	8
MIMAT0000280	hsa-miR-223-3p	NPC1	1	0	0	0	0	0	0	1
MIMAT0000281	hsa-miR-224-5p	NPC1	1	0	0	0	0	0	0	5
MIMAT0000318	hsa-miR-200b-3p	NPC1	1	0	0	0	1	0	1	10
MIMAT0000418	hsa-miR-23b-3p	NPC1	1	0	0	0	0	0	0	11
MIMAT0000419	hsa-miR-27b-3p	NPC1	1	0	0	0	0	0	0	13
MIMAT0000419	hsa-miR-27b-3p	NPC1	1	0	0	0	0	0	0	13
MIMAT0000420	hsa-miR-30b-5p	NPC1	1	0	0	0	0	0	0	15
MIMAT0000424	hsa-miR-128-3p	NPC1	1	0	0	0	0	0	0	9
MIMAT0000425	hsa-miR-130a-3p	NPC1	1	0	0	0	0	0	0	12
MIMAT0000428	hsa-miR-135a-5p	NPC1	1	0	1	0	1	0	1	17
MIMAT0000429	hsa-miR-137	NPC1	1	0	0	0	1	1	1	4
MIMAT0000431	hsa-miR-140-5p	NPC1	1	0	0	0	0	0	0	5
MIMAT0000433	hsa-miR-142-5p	NPC1	1	0	0	0	0	0	0	2
MIMAT0000433	hsa-miR-142-5p	NPC1	1	0	0	0	0	0	0	2
MIMAT0000437	hsa-miR-145-5p	NPC1	1	0	0	0	0	0	0	6
MIMAT0000438	hsa-miR-152-3p	NPC1	1	0	1	0	1	0	0	5
MIMAT0000442	hsa-miR-9-3p	NPC1	0	0	1	0	0	1	0	3
MIMAT0000446	hsa-miR-127-3p	NPC1	1	0	0	0	0	0	0	3
MIMAT0000455	hsa-miR-185-5p	NPC1	1	0	1	0	1	0	0	1
MIMAT0000456	hsa-miR-186-5p	NPC1	1	0	0	0	0	0	0	9
MIMAT0000510	hsa-miR-320a	NPC1	1	0	0	0	1	1	0	11
MIMAT0000510	hsa-miR-320a	NPC1	1	0	0	0	1	0	0	11
MIMAT0000617	hsa-miR-200c-3p	NPC1	1	0	0	0	1	1	1	13
MIMAT0000680	hsa-miR-106b-5p	NPC1	1	0	0	0	1	0	0	12
MIMAT0000681	hsa-miR-29c-3p	NPC1	1	0	0	0	0	0	0	9
MIMAT0000688	hsa-miR-301a-3p	NPC1	1	0	0	0	0	0	0	11
MIMAT0000689	hsa-miR-99b-5p	NPC1	1	0	0	0	0	0	0	8
MIMAT0000691	hsa-miR-130b-3p	NPC1	1	0	0	0	0	0	0	12
MIMAT0000692	hsa-miR-30e-5p	NPC1	1	0	0	0	0	0	0	11
MIMAT0000707	hsa-miR-363-3p	NPC1	1	0	0	0	1	0	1	9
MIMAT0000719	hsa-miR-367-3p	NPC1	1	0	0	0	1	1	1	0
MIMAT0000722	hsa-miR-370-3p	NPC1	1	0	0	0	0	0	0	4
MIMAT0000732	hsa-miR-378a-3p	NPC1	0	0	1	0	0	0	0	4
MIMAT0000751	hsa-miR-330-3p	NPC1	1	0	1	0	0	0	0	7
MIMAT0000758	hsa-miR-135b-5p	NPC1	1	0	1	0	1	0	1	10
MIMAT0000759	hsa-miR-148b-3p	NPC1	1	0	1	0	1	0	0	12
MIMAT0000771	hsa-miR-325	NPC1	1	0	0	0	0	0	0	0
MIMAT0001339	hsa-miR-422a	NPC1	0	0	1	0	0	0	0	0
MIMAT0001413	hsa-miR-20b-5p	NPC1	1	0	0	0	1	0	0	10
MIMAT0001536	hsa-miR-429	NPC1	1	0	0	0	1	1	1	14
MIMAT0001639	hsa-miR-409-3p	NPC1	1	0	0	0	0	0	0	4
MIMAT0002171	hsa-miR-410-3p	NPC1	1	0	0	0	1	1	0	5
MIMAT0002175	hsa-miR-485-5p	NPC1	1	0	1	0	1	0	0	4
MIMAT0002821	hsa-miR-181d-5p	NPC1	1	0	0	0	0	0	0	10
MIMAT0002833	hsa-miR-520a-5p	NPC1	1	0	0	0	0	0	0	1
MIMAT0002838	hsa-miR-525-5p	NPC1	1	0	0	0	0	0	0	2
MIMAT0002849	hsa-miR-524-5p	NPC1	1	0	1	0	0	0	0	2
MIMAT0002853	hsa-miR-519d-3p	NPC1	1	0	0	0	1	0	0	2
MIMAT0002855	hsa-miR-520d-5p	NPC1	1	0	1	0	0	0	0	2
MIMAT0002858	hsa-miR-520g-3p	NPC1	1	0	0	0	0	0	0	2
MIMAT0002867	hsa-miR-520h	NPC1	1	0	0	0	0	0	0	3
MIMAT0002871	hsa-miR-500a-3p	NPC1	0	0	1	0	0	0	0	8
MIMAT0002876	hsa-miR-505-3p	NPC1	1	0	0	0	0	0	0	10
MIMAT0002877	hsa-miR-513a-5p	NPC1	1	0	0	0	0	0	0	3
MIMAT0002877	hsa-miR-513a-5p	NPC1	1	0	0	0	0	0	0	3
MIMAT0002881	hsa-miR-509-3p	NPC1	1	0	0	0	0	0	0	7
MIMAT0003214	hsa-miR-551a	NPC1	1	0	0	0	0	0	0	6
MIMAT0003218	hsa-miR-92b-3p	NPC1	1	0	0	0	1	1	1	5
MIMAT0003233	hsa-miR-551b-3p	NPC1	1	0	0	0	0	0	0	5
MIMAT0003249	hsa-miR-584-5p	NPC1	1	0	0	0	0	0	0	3
MIMAT0003301	hsa-miR-33b-5p	NPC1	1	0	1	0	1	1	1	6
MIMAT0003301	hsa-miR-33b-5p	NPC1	1	0	1	0	1	0	1	6
MIMAT0003301	hsa-miR-33b-5p	NPC1	1	0	1	0	0	0	0	6
MIMAT0003331	hsa-miR-655-3p	NPC1	1	0	0	0	0	0	0	4
MIMAT0003881	hsa-miR-668-3p	NPC1	1	0	0	0	0	0	0	4
MIMAT0003885	hsa-miR-454-3p	NPC1	1	0	0	0	0	0	0	12
MIMAT0004692	hsa-miR-340-5p	NPC1	1	0	0	0	1	0	0	5
MIMAT0004692	hsa-miR-340-5p	NPC1	1	0	0	0	0	0	0	5
MIMAT0004692	hsa-miR-340-5p	NPC1	1	0	0	0	1	0	0	5
MIMAT0004795	hsa-miR-574-5p	NPC1	1	0	0	0	0	0	0	0
MIMAT0004809	hsa-miR-628-5p	NPC1	0	0	1	0	0	0	0	4
MIMAT0004911	hsa-miR-874-3p	NPC1	0	0	0	0	1	0	0	9
MIMAT0004954	hsa-miR-543	NPC1	0	1	0	0	1	0	0	3
MIMAT0004958	hsa-miR-301b-3p	NPC1	1	0	0	0	0	0	0	6
MIMAT0005792	hsa-miR-320b	NPC1	1	0	0	0	1	1	0	7
MIMAT0005792	hsa-miR-320b	NPC1	1	0	0	0	1	0	0	7
MIMAT0005793	hsa-miR-320c	NPC1	1	0	0	0	1	1	0	5
MIMAT0005793	hsa-miR-320c	NPC1	1	0	0	0	1	0	0	5
MIMAT0005796	hsa-miR-1271-5p	NPC1	1	0	0	0	0	0	0	7
MIMAT0005797	hsa-miR-1301-3p	NPC1	1	0	0	0	0	0	0	5
MIMAT0005899	hsa-miR-1247-5p	NPC1	1	0	1	0	0	0	0	3
MIMAT0006764	hsa-miR-320d	NPC1	1	0	0	0	1	1	0	4
MIMAT0006764	hsa-miR-320d	NPC1	1	0	0	0	1	0	0	4
MIMAT0014999	hsa-miR-378b	NPC1	0	0	1	0	0	0	0	0
MIMAT0016847	hsa-miR-378c	NPC1	0	0	1	0	0	0	0	7
MIMAT0016858	hsa-miR-4306	NPC1	0	0	1	0	0	0	0	0
MIMAT0018444	hsa-miR-642b-3p	NPC1	0	0	1	0	0	0	0	1
MIMAT0018926	hsa-miR-378d	NPC1	0	0	1	0	0	0	0	4
MIMAT0018927	hsa-miR-378e	NPC1	0	0	1	0	0	0	0	0
MIMAT0018932	hsa-miR-378f	NPC1	0	0	1	0	0	0	0	1
MIMAT0018943	hsa-miR-4428	NPC1	0	0	1	0	0	0	0	1
MIMAT0018944	hsa-miR-4429	NPC1	0	0	0	0	0	1	0	0
MIMAT0018984	hsa-miR-378h	NPC1	0	0	1	0	0	0	0	0
MIMAT0019074	hsa-miR-378i	NPC1	0	0	1	0	0	0	0	0
MIMAT0019704	hsa-miR-4644	NPC1	0	0	1	0	0	0	0	1
MIMAT0019845	hsa-miR-4726-5p	NPC1	0	1	0	0	0	0	0	5
MIMAT0019868	hsa-miR-4739	NPC1	0	1	0	0	0	0	0	2
MIMAT0019917	hsa-miR-4766-5p	NPC1	0	1	0	0	0	0	0	1
MIMAT0019948	hsa-miR-4784	NPC1	0	1	0	0	0	0	0	2
MIMAT0020924	hsa-miR-642a-3p	NPC1	0	0	1	0	0	0	0	2
MIMAT0022300	hsa-miR-5590-3p	NPC1	0	0	1	0	0	0	0	1
MIMAT0022300	hsa-miR-5590-3p	NPC1	0	0	1	0	0	0	0	1
MIMAT0022714	hsa-miR-766-5p	NPC1	0	1	0	0	0	0	0	3
MIMAT0022726	hsa-miR-1306-5p	NPC1	0	0	1	0	0	0	0	7
MIMAT0000070	hsa-miR-17-5p	PIK3C3	0	1	1	1	0	0	0	5
MIMAT0000070	hsa-miR-17-5p	PIK3C3	0	0	1	1	0	0	0	5
MIMAT0000070	hsa-miR-17-5p	PIK3C3	0	0	0	1	0	0	0	5
MIMAT0000073	hsa-miR-19a-3p	PIK3C3	0	0	0	1	0	0	0	7
MIMAT0000074	hsa-miR-19b-3p	PIK3C3	0	0	0	1	0	0	0	7
MIMAT0000075	hsa-miR-20a-5p	PIK3C3	0	1	1	1	0	0	0	6
MIMAT0000075	hsa-miR-20a-5p	PIK3C3	0	0	1	1	0	0	0	6
MIMAT0000075	hsa-miR-20a-5p	PIK3C3	0	0	0	1	0	0	0	6
MIMAT0000082	hsa-miR-26a-5p	PIK3C3	0	0	0	1	0	0	0	3
MIMAT0000082	hsa-miR-26a-5p	PIK3C3	0	0	0	1	0	0	0	3
MIMAT0000082	hsa-miR-26a-5p	PIK3C3	0	0	0	0	1	0	0	3
MIMAT0000083	hsa-miR-26b-5p	PIK3C3	0	0	0	1	0	0	0	7
MIMAT0000083	hsa-miR-26b-5p	PIK3C3	0	0	0	1	0	0	0	7
MIMAT0000083	hsa-miR-26b-5p	PIK3C3	0	0	0	0	1	0	0	7
MIMAT0000084	hsa-miR-27a-3p	PIK3C3	0	0	0	1	0	0	0	9
MIMAT0000086	hsa-miR-29a-3p	PIK3C3	0	0	1	0	0	0	0	11
MIMAT0000093	hsa-miR-93-5p	PIK3C3	0	1	1	1	0	0	0	5
MIMAT0000093	hsa-miR-93-5p	PIK3C3	0	0	1	1	0	0	0	5
MIMAT0000093	hsa-miR-93-5p	PIK3C3	0	0	0	1	0	0	0	5
MIMAT0000100	hsa-miR-29b-3p	PIK3C3	0	0	1	0	0	0	0	19
MIMAT0000103	hsa-miR-106a-5p	PIK3C3	0	1	1	1	0	0	0	10
MIMAT0000103	hsa-miR-106a-5p	PIK3C3	0	0	1	1	0	0	0	10
MIMAT0000103	hsa-miR-106a-5p	PIK3C3	0	0	0	1	0	0	0	10
MIMAT0000242	hsa-miR-129-5p	PIK3C3	0	0	0	1	0	0	0	1
MIMAT0000242	hsa-miR-129-5p	PIK3C3	0	0	1	1	0	0	0	1
MIMAT0000265	hsa-miR-204-5p	PIK3C3	0	0	0	1	0	0	0	1
MIMAT0000268	hsa-miR-211-5p	PIK3C3	0	0	0	1	0	0	0	4
MIMAT0000318	hsa-miR-200b-3p	PIK3C3	0	0	1	1	0	0	0	6
MIMAT0000419	hsa-miR-27b-3p	PIK3C3	0	0	0	1	0	0	0	3
MIMAT0000432	hsa-miR-141-3p	PIK3C3	0	0	0	0	1	0	0	16
MIMAT0000433	hsa-miR-142-5p	PIK3C3	0	0	0	2	0	0	0	10
MIMAT0000444	hsa-miR-126-5p	PIK3C3	0	0	0	1	0	0	0	6
MIMAT0000459	hsa-miR-193a-3p	PIK3C3	0	0	0	0	1	0	0	14
MIMAT0000510	hsa-miR-320a	PIK3C3	0	0	0	0	1	0	0	4
MIMAT0000617	hsa-miR-200c-3p	PIK3C3	0	0	1	1	0	0	0	7
MIMAT0000680	hsa-miR-106b-5p	PIK3C3	0	0	1	1	0	0	0	12
MIMAT0000680	hsa-miR-106b-5p	PIK3C3	0	0	1	1	0	0	0	12
MIMAT0000680	hsa-miR-106b-5p	PIK3C3	0	0	0	1	0	0	0	12
MIMAT0000681	hsa-miR-29c-3p	PIK3C3	0	0	1	0	0	0	0	5
MIMAT0000682	hsa-miR-200a-3p	PIK3C3	0	0	0	0	1	0	0	6
MIMAT0000684	hsa-miR-302a-3p	PIK3C3	0	1	1	0	0	0	0	1
MIMAT0000715	hsa-miR-302b-3p	PIK3C3	0	0	1	0	0	0	0	1
MIMAT0000717	hsa-miR-302c-3p	PIK3C3	0	0	1	0	0	0	0	1
MIMAT0000718	hsa-miR-302d-3p	PIK3C3	0	0	1	0	0	0	0	1
MIMAT0000724	hsa-miR-372-3p	PIK3C3	0	0	1	0	0	0	0	1
MIMAT0000726	hsa-miR-373-3p	PIK3C3	0	0	1	0	0	0	0	4
MIMAT0000727	hsa-miR-374a-5p	PIK3C3	0	0	0	0	1	0	0	3
MIMAT0000735	hsa-miR-380-3p	PIK3C3	0	0	0	1	0	0	0	2
MIMAT0000735	hsa-miR-380-3p	PIK3C3	0	0	0	1	0	0	0	2
MIMAT0000735	hsa-miR-380-3p	PIK3C3	0	0	1	1	0	0	0	2
MIMAT0000735	hsa-miR-380-3p	PIK3C3	0	0	1	1	0	0	0	2
MIMAT0001413	hsa-miR-20b-5p	PIK3C3	0	1	1	1	0	0	0	6
MIMAT0001413	hsa-miR-20b-5p	PIK3C3	0	0	1	1	0	0	0	6
MIMAT0001413	hsa-miR-20b-5p	PIK3C3	0	0	0	1	0	0	0	6
MIMAT0001536	hsa-miR-429	PIK3C3	0	0	1	1	0	0	0	9
MIMAT0001635	hsa-miR-452-5p	PIK3C3	0	0	0	1	0	0	0	8
MIMAT0001635	hsa-miR-452-5p	PIK3C3	0	0	0	1	0	0	0	8
MIMAT0002171	hsa-miR-410-3p	PIK3C3	0	0	0	1	0	0	0	2
MIMAT0002171	hsa-miR-410-3p	PIK3C3	0	0	1	1	0	0	0	2
MIMAT0002171	hsa-miR-410-3p	PIK3C3	0	0	1	1	0	0	0	2
MIMAT0002819	hsa-miR-193b-3p	PIK3C3	0	0	0	0	1	0	0	20
MIMAT0002819	hsa-miR-193b-3p	PIK3C3	0	0	1	0	0	0	0	20
MIMAT0002823	hsa-miR-512-3p	PIK3C3	0	0	1	0	0	0	0	3
MIMAT0002824	hsa-miR-498	PIK3C3	0	0	0	1	0	0	0	3
MIMAT0002824	hsa-miR-498	PIK3C3	0	0	0	1	0	0	0	3
MIMAT0002825	hsa-miR-520e	PIK3C3	0	0	1	1	0	0	0	3
MIMAT0002826	hsa-miR-515-5p	PIK3C3	0	0	0	1	0	0	0	3
MIMAT0002828	hsa-miR-519e-5p	PIK3C3	0	0	0	1	0	0	0	4
MIMAT0002830	hsa-miR-520f-3p	PIK3C3	0	0	1	0	0	0	0	3
MIMAT0002834	hsa-miR-520a-3p	PIK3C3	0	0	1	1	0	0	0	3
MIMAT0002835	hsa-miR-526b-5p	PIK3C3	1	0	0	0	0	0	0	5
MIMAT0002836	hsa-miR-526b-3p	PIK3C3	0	1	1	1	0	0	0	2
MIMAT0002836	hsa-miR-526b-3p	PIK3C3	0	0	1	1	0	0	0	2
MIMAT0002836	hsa-miR-526b-3p	PIK3C3	0	0	0	1	0	0	0	2
MIMAT0002843	hsa-miR-520b	PIK3C3	0	0	1	1	0	0	0	3
MIMAT0002846	hsa-miR-520c-3p	PIK3C3	0	0	1	1	0	0	0	3
MIMAT0002853	hsa-miR-519d-3p	PIK3C3	0	0	1	1	0	0	0	3
MIMAT0002853	hsa-miR-519d-3p	PIK3C3	0	0	1	1	0	0	0	3
MIMAT0002853	hsa-miR-519d-3p	PIK3C3	0	0	0	1	0	0	0	3
MIMAT0002856	hsa-miR-520d-3p	PIK3C3	0	0	1	1	0	0	0	2
MIMAT0002883	hsa-miR-514a-3p	PIK3C3	0	0	0	1	0	0	0	4
MIMAT0003165	hsa-miR-545-3p	PIK3C3	0	0	0	1	0	0	0	2
MIMAT0003241	hsa-miR-576-5p	PIK3C3	0	0	0	1	0	0	0	11
MIMAT0003242	hsa-miR-577	PIK3C3	0	0	0	1	0	0	0	3
MIMAT0003249	hsa-miR-584-5p	PIK3C3	0	0	1	0	0	0	0	11
MIMAT0003294	hsa-miR-625-5p	PIK3C3	0	0	0	1	0	0	0	8
MIMAT0003332	hsa-miR-656-3p	PIK3C3	0	0	0	1	0	0	0	4
MIMAT0003339	hsa-miR-421	PIK3C3	0	0	0	0	1	0	0	2
MIMAT0004597	hsa-miR-140-3p	PIK3C3	0	0	1	1	0	0	0	5
MIMAT0004687	hsa-miR-371a-5p	PIK3C3	0	0	1	1	0	0	0	2
MIMAT0004690	hsa-miR-379-3p	PIK3C3	0	0	0	1	0	0	0	2
MIMAT0004690	hsa-miR-379-3p	PIK3C3	0	0	1	1	0	0	0	2
MIMAT0004690	hsa-miR-379-3p	PIK3C3	0	0	1	1	0	0	0	2
MIMAT0004692	hsa-miR-340-5p	PIK3C3	0	0	0	1	0	0	0	9
MIMAT0004813	hsa-miR-411-3p	PIK3C3	0	0	0	1	0	0	0	5
MIMAT0004813	hsa-miR-411-3p	PIK3C3	0	0	1	1	0	0	0	5
MIMAT0004813	hsa-miR-411-3p	PIK3C3	0	0	1	1	0	0	0	5
MIMAT0004921	hsa-miR-889-3p	PIK3C3	0	0	1	1	0	0	0	4
MIMAT0004921	hsa-miR-889-3p	PIK3C3	0	0	1	1	0	0	0	4
MIMAT0004921	hsa-miR-889-3p	PIK3C3	0	0	1	1	0	0	0	4
MIMAT0004949	hsa-miR-877-5p	PIK3C3	0	0	0	1	0	0	0	8
MIMAT0004955	hsa-miR-374b-5p	PIK3C3	0	0	0	0	1	0	0	5
MIMAT0004955	hsa-miR-374b-5p	PIK3C3	0	0	0	1	0	0	0	5
MIMAT0004985	hsa-miR-942-5p	PIK3C3	0	0	0	1	0	0	0	7
MIMAT0004985	hsa-miR-942-5p	PIK3C3	0	0	0	1	0	0	0	7
MIMAT0004987	hsa-miR-944	PIK3C3	0	0	1	1	0	0	0	4
MIMAT0005792	hsa-miR-320b	PIK3C3	0	0	0	0	1	0	0	5
MIMAT0005793	hsa-miR-320c	PIK3C3	0	0	0	0	1	0	0	3
MIMAT0005795	hsa-miR-1323	PIK3C3	0	0	0	1	0	0	0	3
MIMAT0005886	hsa-miR-1297	PIK3C3	0	0	0	1	0	0	0	0
MIMAT0005886	hsa-miR-1297	PIK3C3	0	0	0	1	0	0	0	0
MIMAT0005886	hsa-miR-1297	PIK3C3	0	0	0	0	1	0	0	0
MIMAT0005919	hsa-miR-548o-3p	PIK3C3	0	0	1	1	0	0	0	4
MIMAT0005930	hsa-miR-1276	PIK3C3	0	0	0	1	0	0	0	1
MIMAT0005930	hsa-miR-1276	PIK3C3	0	0	1	0	0	0	0	1
MIMAT0005930	hsa-miR-1276	PIK3C3	0	0	0	1	0	0	0	1
MIMAT0005931	hsa-miR-302e	PIK3C3	0	0	1	0	0	0	0	0
MIMAT0005944	hsa-miR-1252-5p	PIK3C3	0	0	1	0	0	0	0	3
MIMAT0006764	hsa-miR-320d	PIK3C3	0	0	0	0	1	0	0	3
MIMAT0011157	hsa-miR-2114-3p	PIK3C3	0	0	1	0	0	0	0	1
MIMAT0013515	hsa-miR-2681-5p	PIK3C3	0	0	0	1	0	0	0	0
MIMAT0015088	hsa-miR-514b-3p	PIK3C3	0	0	0	1	0	0	0	1
MIMAT0018358	hsa-miR-3942-5p	PIK3C3	0	0	0	1	0	0	0	1
MIMAT0019214	hsa-miR-3173-5p	PIK3C3	0	0	1	0	0	0	0	2
MIMAT0022300	hsa-miR-5590-3p	PIK3C3	0	0	0	2	0	0	0	2
MIMAT0022701	hsa-miR-506-5p	PIK3C3	0	0	0	1	0	0	0	2
MIMAT0022701	hsa-miR-506-5p	PIK3C3	0	0	1	1	0	0	0	2
MIMAT0022701	hsa-miR-506-5p	PIK3C3	0	0	1	1	0	0	0	2
MIMAT0022724	hsa-miR-1277-5p	PIK3C3	0	0	0	1	0	0	0	2
MIMAT0022724	hsa-miR-1277-5p	PIK3C3	0	0	1	1	0	0	0	2
MIMAT0022724	hsa-miR-1277-5p	PIK3C3	0	0	0	1	0	0	0	2
MIMAT0022724	hsa-miR-1277-5p	PIK3C3	0	0	1	1	0	0	0	2
MIMAT0022735	hsa-miR-374c-3p	PIK3C3	0	0	1	0	0	0	0	1
MIMAT0025857	hsa-miR-892c-5p	PIK3C3	0	0	1	0	0	0	0	0
MIMAT0025857	hsa-miR-892c-5p	PIK3C3	0	0	1	0	0	0	0	0
MIMAT0000080	hsa-miR-24-3p	RAB7A	1	0	0	0	0	0	0	3
MIMAT0000081	hsa-miR-25-3p	RAB7A	1	0	1	1	1	0	0	5
MIMAT0000085	hsa-miR-28-5p	RAB7A	1	0	0	1	0	0	0	2
MIMAT0000087	hsa-miR-30a-5p	RAB7A	1	0	0	1	1	0	1	6
MIMAT0000089	hsa-miR-31-5p	RAB7A	1	0	0	0	0	0	0	2
MIMAT0000090	hsa-miR-32-5p	RAB7A	1	0	1	1	1	0	0	5
MIMAT0000091	hsa-miR-33a-5p	RAB7A	1	0	0	0	0	0	0	6
MIMAT0000092	hsa-miR-92a-3p	RAB7A	1	0	0	0	1	0	0	3
MIMAT0000094	hsa-miR-95-3p	RAB7A	1	0	0	0	0	0	0	8
MIMAT0000095	hsa-miR-96-5p	RAB7A	0	0	0	1	0	0	0	7
MIMAT0000095	hsa-miR-96-5p	RAB7A	1	0	0	1	0	1	0	7
MIMAT0000095	hsa-miR-96-5p	RAB7A	1	0	0	1	0	0	0	7
MIMAT0000231	hsa-miR-199a-5p	RAB7A	1	0	0	0	0	0	0	6
MIMAT0000242	hsa-miR-129-5p	RAB7A	1	0	0	0	0	0	0	5
MIMAT0000242	hsa-miR-129-5p	RAB7A	1	0	0	0	1	0	0	5
MIMAT0000244	hsa-miR-30c-5p	RAB7A	1	0	0	1	1	0	1	12
MIMAT0000245	hsa-miR-30d-5p	RAB7A	1	0	0	1	1	0	1	9
MIMAT0000251	hsa-miR-147a	RAB7A	3	0	3	11	0	0	0	2
MIMAT0000251	hsa-miR-147a	RAB7A	3	0	3	1	0	0	0	2
MIMAT0000251	hsa-miR-147a	RAB7A	3	0	3	0	0	0	0	2
MIMAT0000251	hsa-miR-147a	RAB7A	3	0	3	0	0	0	0	2
MIMAT0000252	hsa-miR-7-5p	RAB7A	1	0	0	0	0	0	0	5
MIMAT0000259	hsa-miR-182-5p	RAB7A	1	0	0	1	0	1	0	6
MIMAT0000259	hsa-miR-182-5p	RAB7A	1	0	0	0	0	0	0	6
MIMAT0000263	hsa-miR-199b-5p	RAB7A	1	0	0	0	0	0	0	4
MIMAT0000266	hsa-miR-205-5p	RAB7A	1	0	0	0	0	0	0	4
MIMAT0000267	hsa-miR-210-3p	RAB7A	1	0	1	0	1	0	0	6
MIMAT0000269	hsa-miR-212-3p	RAB7A	1	0	0	0	0	0	0	4
MIMAT0000275	hsa-miR-218-5p	RAB7A	1	0	0	0	0	0	0	12
MIMAT0000278	hsa-miR-221-3p	RAB7A	1	0	0	0	0	0	0	1
MIMAT0000279	hsa-miR-222-3p	RAB7A	1	0	0	0	0	0	0	2
MIMAT0000318	hsa-miR-200b-3p	RAB7A	1	0	0	1	1	0	1	8
MIMAT0000420	hsa-miR-30b-5p	RAB7A	1	0	0	1	1	0	1	13
MIMAT0000426	hsa-miR-132-3p	RAB7A	1	0	0	0	0	0	0	5
MIMAT0000432	hsa-miR-141-3p	RAB7A	1	0	0	0	0	0	0	9
MIMAT0000435	hsa-miR-143-3p	RAB7A	1	0	1	1	1	1	1	6
MIMAT0000435	hsa-miR-143-3p	RAB7A	1	0	1	1	0	0	0	6
MIMAT0000437	hsa-miR-145-5p	RAB7A	1	0	0	0	0	0	0	7
MIMAT0000439	hsa-miR-153-3p	RAB7A	1	0	0	1	1	1	1	8
MIMAT0000441	hsa-miR-9-5p	RAB7A	1	0	0	0	0	0	0	7
MIMAT0000448	hsa-miR-136-5p	RAB7A	1	0	0	0	0	0	0	6
MIMAT0000450	hsa-miR-149-5p	RAB7A	1	0	0	0	0	0	0	8
MIMAT0000452	hsa-miR-154-5p	RAB7A	1	0	0	0	0	0	0	4
MIMAT0000455	hsa-miR-185-5p	RAB7A	1	0	1	1	0	0	0	1
MIMAT0000455	hsa-miR-185-5p	RAB7A	1	0	1	1	1	0	0	1
MIMAT0000456	hsa-miR-186-5p	RAB7A	1	0	0	1	1	0	0	5
MIMAT0000456	hsa-miR-186-5p	RAB7A	1	0	0	1	0	0	0	5
MIMAT0000458	hsa-miR-190a-5p	RAB7A	1	0	0	0	0	0	0	4
MIMAT0000460	hsa-miR-194-5p	RAB7A	1	0	1	0	0	0	0	7
MIMAT0000460	hsa-miR-194-5p	RAB7A	1	0	1	0	0	0	0	7
MIMAT0000462	hsa-miR-206	RAB7A	0	1	0	0	0	0	0	3
MIMAT0000510	hsa-miR-320a	RAB7A	1	0	0	0	0	0	0	10
MIMAT0000510	hsa-miR-320a	RAB7A	1	0	0	0	0	0	0	10
MIMAT0000617	hsa-miR-200c-3p	RAB7A	1	0	0	1	1	1	1	4
MIMAT0000682	hsa-miR-200a-3p	RAB7A	1	0	0	0	0	0	0	9
MIMAT0000684	hsa-miR-302a-3p	RAB7A	1	0	0	0	1	1	0	0
MIMAT0000687	hsa-miR-299-3p	RAB7A	1	0	1	0	1	0	0	2
MIMAT0000687	hsa-miR-299-3p	RAB7A	1	0	1	0	0	0	0	2
MIMAT0000692	hsa-miR-30e-5p	RAB7A	1	0	0	1	1	0	1	10
MIMAT0000703	hsa-miR-361-5p	RAB7A	1	0	0	0	1	0	0	5
MIMAT0000707	hsa-miR-363-3p	RAB7A	1	0	1	0	1	0	0	6
MIMAT0000710	hsa-miR-365a-3p	RAB7A	1	0	0	0	0	0	0	7
MIMAT0000715	hsa-miR-302b-3p	RAB7A	1	0	0	0	1	0	0	1
MIMAT0000717	hsa-miR-302c-3p	RAB7A	1	0	0	0	1	0	0	1
MIMAT0000718	hsa-miR-302d-3p	RAB7A	1	0	0	0	1	0	0	2
MIMAT0000719	hsa-miR-367-3p	RAB7A	1	0	1	0	1	0	0	0
MIMAT0000721	hsa-miR-369-3p	RAB7A	1	0	0	0	0	0	0	5
MIMAT0000722	hsa-miR-370-3p	RAB7A	1	0	0	0	1	0	0	2
MIMAT0000724	hsa-miR-372-3p	RAB7A	1	0	0	0	1	0	0	1
MIMAT0000726	hsa-miR-373-3p	RAB7A	1	0	0	1	1	0	0	2
MIMAT0000728	hsa-miR-375	RAB7A	1	0	1	2	0	0	0	11
MIMAT0000728	hsa-miR-375	RAB7A	1	0	1	0	0	0	0	11
MIMAT0000736	hsa-miR-381-3p	RAB7A	1	0	0	0	1	0	0	3
MIMAT0000738	hsa-miR-383-5p	RAB7A	1	0	0	0	1	0	0	7
MIMAT0000760	hsa-miR-331-3p	RAB7A	1	0	1	0	0	0	0	6
MIMAT0000762	hsa-miR-324-3p	RAB7A	0	0	0	0	0	1	0	3
MIMAT0001532	hsa-miR-448	RAB7A	1	0	1	1	1	1	1	4
MIMAT0001536	hsa-miR-429	RAB7A	1	0	0	0	1	1	1	8
MIMAT0002177	hsa-miR-486-5p	RAB7A	1	0	0	0	0	0	0	1
MIMAT0002807	hsa-miR-491-5p	RAB7A	1	0	1	1	0	0	0	4
MIMAT0002807	hsa-miR-491-5p	RAB7A	1	0	1	1	1	0	0	4
MIMAT0002817	hsa-miR-495-3p	RAB7A	1	0	0	0	0	0	0	5
MIMAT0002823	hsa-miR-512-3p	RAB7A	1	0	0	0	0	0	0	3
MIMAT0002824	hsa-miR-498	RAB7A	1	0	0	0	0	0	0	1
MIMAT0002825	hsa-miR-520e	RAB7A	1	0	0	0	1	1	0	0
MIMAT0002826	hsa-miR-515-5p	RAB7A	1	0	0	0	0	0	0	1
MIMAT0002830	hsa-miR-520f-3p	RAB7A	1	0	0	0	0	0	0	0
MIMAT0002832	hsa-miR-519c-3p	RAB7A	1	0	0	0	0	0	0	3
MIMAT0002834	hsa-miR-520a-3p	RAB7A	1	0	0	0	1	0	0	4
MIMAT0002837	hsa-miR-519b-3p	RAB7A	1	0	0	0	0	0	0	2
MIMAT0002839	hsa-miR-525-3p	RAB7A	1	0	0	0	0	0	0	1
MIMAT0002843	hsa-miR-520b	RAB7A	1	0	0	0	1	0	0	0
MIMAT0002846	hsa-miR-520c-3p	RAB7A	1	0	0	0	1	0	0	0
MIMAT0002849	hsa-miR-524-5p	RAB7A	1	0	0	0	0	0	0	4
MIMAT0002850	hsa-miR-524-3p	RAB7A	1	0	0	0	0	0	0	1
MIMAT0002855	hsa-miR-520d-5p	RAB7A	1	0	0	0	0	0	0	2
MIMAT0002856	hsa-miR-520d-3p	RAB7A	1	0	0	0	1	0	0	2
MIMAT0002868	hsa-miR-522-3p	RAB7A	1	0	0	0	0	1	0	1
MIMAT0002869	hsa-miR-519a-3p	RAB7A	1	0	0	0	0	0	0	1
MIMAT0002882	hsa-miR-510-5p	RAB7A	1	0	0	0	0	0	0	3
MIMAT0002882	hsa-miR-510-5p	RAB7A	1	0	0	0	0	0	0	3
MIMAT0003218	hsa-miR-92b-3p	RAB7A	1	0	1	0	1	0	0	9
MIMAT0003241	hsa-miR-576-5p	RAB7A	1	0	0	0	0	0	0	6
MIMAT0003242	hsa-miR-577	RAB7A	1	0	0	0	0	0	0	7
MIMAT0003245	hsa-miR-580-3p	RAB7A	1	0	1	0	0	0	0	4
MIMAT0003267	hsa-miR-599	RAB7A	1	0	1	0	0	0	0	3
MIMAT0003267	hsa-miR-599	RAB7A	1	0	1	0	1	1	0	3
MIMAT0003289	hsa-miR-620	RAB7A	1	0	0	0	0	0	0	0
MIMAT0003294	hsa-miR-625-5p	RAB7A	2	0	1	1	0	0	0	5
MIMAT0003301	hsa-miR-33b-5p	RAB7A	1	0	0	0	0	0	0	8
MIMAT0003328	hsa-miR-653-5p	RAB7A	1	0	0	1	1	0	0	3
MIMAT0003330	hsa-miR-654-5p	RAB7A	1	0	1	0	0	0	0	2
MIMAT0003330	hsa-miR-654-5p	RAB7A	1	0	1	0	0	0	0	2
MIMAT0003332	hsa-miR-656-3p	RAB7A	1	0	0	0	0	1	0	4
MIMAT0003879	hsa-miR-758-3p	RAB7A	1	0	0	0	0	0	0	4
MIMAT0004185	hsa-miR-802	RAB7A	1	0	1	0	0	1	0	4
MIMAT0004185	hsa-miR-802	RAB7A	1	0	1	0	0	1	0	4
MIMAT0004502	hsa-miR-28-3p	RAB7A	1	0	0	0	0	0	0	5
MIMAT0004597	hsa-miR-140-3p	RAB7A	1	0	0	0	0	0	0	7
MIMAT0004675	hsa-miR-219a-2-3p	RAB7A	1	0	0	1	0	0	0	1
MIMAT0004679	hsa-miR-296-3p	RAB7A	1	0	1	0	0	0	0	1
MIMAT0004679	hsa-miR-296-3p	RAB7A	1	0	1	0	0	0	0	1
MIMAT0004687	hsa-miR-371a-5p	RAB7A	0	1	0	0	0	0	0	0
MIMAT0004748	hsa-miR-423-5p	RAB7A	1	1	1	0	0	0	0	9
MIMAT0004748	hsa-miR-423-5p	RAB7A	1	0	1	0	0	0	0	9
MIMAT0004810	hsa-miR-629-5p	RAB7A	1	0	0	0	0	0	0	6
MIMAT0004903	hsa-miR-300	RAB7A	1	0	0	0	1	0	0	0
MIMAT0004920	hsa-miR-541-3p	RAB7A	1	0	1	0	0	0	0	4
MIMAT0004920	hsa-miR-541-3p	RAB7A	1	0	1	0	0	0	0	4
MIMAT0004924	hsa-miR-876-5p	RAB7A	1	0	0	0	1	0	0	4
MIMAT0004926	hsa-miR-708-5p	RAB7A	1	0	0	1	0	0	0	5
MIMAT0004928	hsa-miR-147b	RAB7A	1	0	0	0	0	0	0	1
MIMAT0004929	hsa-miR-190b	RAB7A	1	0	0	0	0	0	0	4
MIMAT0004957	hsa-miR-760	RAB7A	1	0	0	0	0	1	0	4
MIMAT0004977	hsa-miR-934	RAB7A	1	0	1	1	0	0	0	5
MIMAT0005792	hsa-miR-320b	RAB7A	1	0	0	0	0	0	0	10
MIMAT0005792	hsa-miR-320b	RAB7A	1	0	0	0	0	0	0	10
MIMAT0005793	hsa-miR-320c	RAB7A	1	0	0	0	0	0	0	9
MIMAT0005793	hsa-miR-320c	RAB7A	1	0	0	0	0	0	0	9
MIMAT0005795	hsa-miR-1323	RAB7A	1	0	0	0	0	0	0	1
MIMAT0005796	hsa-miR-1271-5p	RAB7A	0	1	0	1	0	0	0	4
MIMAT0005796	hsa-miR-1271-5p	RAB7A	1	0	0	1	0	1	0	4
MIMAT0005796	hsa-miR-1271-5p	RAB7A	1	0	0	1	0	0	0	4
MIMAT0005824	hsa-miR-1179	RAB7A	1	0	0	0	0	0	0	4
MIMAT0005824	hsa-miR-1179	RAB7A	1	0	0	0	0	0	0	4
MIMAT0005878	hsa-miR-1287-5p	RAB7A	1	0	1	0	0	1	0	5
MIMAT0005878	hsa-miR-1287-5p	RAB7A	1	0	1	0	0	0	0	5
MIMAT0005878	hsa-miR-1287-5p	RAB7A	1	0	1	0	0	0	0	5
MIMAT0005919	hsa-miR-548o-3p	RAB7A	1	0	0	0	0	0	0	1
MIMAT0005924	hsa-miR-1270	RAB7A	1	0	0	0	0	0	0	3
MIMAT0005930	hsa-miR-1276	RAB7A	1	0	0	0	0	0	0	2
MIMAT0005931	hsa-miR-302e	RAB7A	1	0	0	0	1	1	0	0
MIMAT0005944	hsa-miR-1252-5p	RAB7A	1	0	0	0	0	0	0	2
MIMAT0005952	hsa-miR-1321	RAB7A	1	0	1	0	0	0	0	0
MIMAT0005952	hsa-miR-1321	RAB7A	1	0	1	0	0	0	0	0
MIMAT0006764	hsa-miR-320d	RAB7A	1	0	0	0	0	0	0	10
MIMAT0006764	hsa-miR-320d	RAB7A	1	0	0	0	0	0	0	10
MIMAT0007888	hsa-miR-1913	RAB7A	0	0	0	0	0	1	0	1
MIMAT0007890	hsa-miR-1914-3p	RAB7A	0	0	1	0	0	0	0	2
MIMAT0007890	hsa-miR-1914-3p	RAB7A	0	0	1	0	0	0	0	2
MIMAT0011159	hsa-miR-2115-3p	RAB7A	0	0	1	0	0	0	0	1
MIMAT0011159	hsa-miR-2115-3p	RAB7A	0	0	1	0	0	0	0	1
MIMAT0011159	hsa-miR-2115-3p	RAB7A	0	0	1	0	0	0	0	1
MIMAT0015011	hsa-miR-3142	RAB7A	0	0	1	0	0	0	0	1
MIMAT0015011	hsa-miR-3142	RAB7A	0	0	1	0	0	0	0	1
MIMAT0015023	hsa-miR-3150a-3p	RAB7A	0	0	1	1	0	0	0	1
MIMAT0015023	hsa-miR-3150a-3p	RAB7A	0	0	1	0	0	0	0	1
MIMAT0015064	hsa-miR-3184-5p	RAB7A	0	0	1	0	0	0	0	0
MIMAT0015064	hsa-miR-3184-5p	RAB7A	0	0	1	0	0	0	0	0
MIMAT0015087	hsa-miR-514b-5p	RAB7A	0	1	0	0	0	0	0	3
MIMAT0016858	hsa-miR-4306	RAB7A	0	0	1	1	0	0	0	0
MIMAT0016858	hsa-miR-4306	RAB7A	0	0	1	1	0	0	0	0
MIMAT0018194	hsa-miR-3150b-3p	RAB7A	0	0	1	0	0	0	0	1
MIMAT0018444	hsa-miR-642b-3p	RAB7A	0	0	1	1	0	0	0	1
MIMAT0018444	hsa-miR-642b-3p	RAB7A	0	0	1	1	0	0	0	1
MIMAT0018943	hsa-miR-4428	RAB7A	0	0	1	1	0	0	0	1
MIMAT0018943	hsa-miR-4428	RAB7A	0	0	1	1	0	0	0	1
MIMAT0018943	hsa-miR-4428	RAB7A	0	0	1	1	0	0	0	1
MIMAT0019704	hsa-miR-4644	RAB7A	0	0	1	1	0	0	0	2
MIMAT0019704	hsa-miR-4644	RAB7A	0	0	1	1	0	0	0	2
MIMAT0019868	hsa-miR-4739	RAB7A	0	0	1	0	0	0	0	3
MIMAT0019868	hsa-miR-4739	RAB7A	0	0	1	0	0	0	0	3
MIMAT0019899	hsa-miR-4756-5p	RAB7A	0	0	1	0	0	0	0	0
MIMAT0019899	hsa-miR-4756-5p	RAB7A	0	0	1	0	0	0	0	0
MIMAT0019924	hsa-miR-4770	RAB7A	0	0	0	0	0	1	1	2
MIMAT0019948	hsa-miR-4784	RAB7A	0	0	1	0	0	0	0	3
MIMAT0020924	hsa-miR-642a-3p	RAB7A	0	0	1	1	0	0	0	1
MIMAT0020924	hsa-miR-642a-3p	RAB7A	0	0	1	1	0	0	0	1
MIMAT0021125	hsa-miR-5194	RAB7A	0	0	1	0	0	0	0	0
MIMAT0021125	hsa-miR-5194	RAB7A	0	0	1	0	0	0	0	0
MIMAT0023713	hsa-miR-6088	RAB7A	0	0	1	0	0	1	1	0
MIMAT0023713	hsa-miR-6088	RAB7A	0	0	1	0	0	0	0	0
MIMAT0000062	hsa-let-7a-5p	TMPRSS2	1	0	1	0	1	1	1	1
MIMAT0000063	hsa-let-7b-5p	TMPRSS2	1	0	1	0	1	1	1	3
MIMAT0000064	hsa-let-7c-5p	TMPRSS2	1	0	1	0	1	1	1	5
MIMAT0000065	hsa-let-7d-5p	TMPRSS2	1	0	1	0	1	1	1	4
MIMAT0000066	hsa-let-7e-5p	TMPRSS2	1	0	1	1	1	1	1	3
MIMAT0000067	hsa-let-7f-5p	TMPRSS2	1	0	1	0	1	1	1	1
MIMAT0000068	hsa-miR-15a-5p	TMPRSS2	1	0	0	0	0	0	0	7
MIMAT0000069	hsa-miR-16-5p	TMPRSS2	1	0	0	0	0	0	0	10
MIMAT0000072	hsa-miR-18a-5p	TMPRSS2	1	0	0	0	0	0	0	9
MIMAT0000085	hsa-miR-28-5p	TMPRSS2	1	0	1	0	0	0	0	2
MIMAT0000085	hsa-miR-28-5p	TMPRSS2	1	0	1	0	0	0	0	2
MIMAT0000089	hsa-miR-31-5p	TMPRSS2	1	0	0	0	0	0	0	11
MIMAT0000095	hsa-miR-96-5p	TMPRSS2	1	0	0	0	0	0	0	2
MIMAT0000096	hsa-miR-98-5p	TMPRSS2	1	0	1	0	1	1	1	6
MIMAT0000226	hsa-miR-196a-5p	TMPRSS2	1	0	0	0	0	0	0	7
MIMAT0000256	hsa-miR-181a-5p	TMPRSS2	1	0	0	0	1	0	0	7
MIMAT0000257	hsa-miR-181b-5p	TMPRSS2	1	0	0	0	1	0	0	6
MIMAT0000258	hsa-miR-181c-5p	TMPRSS2	1	0	0	0	1	0	0	6
MIMAT0000259	hsa-miR-182-5p	TMPRSS2	1	0	1	1	1	0	0	3
MIMAT0000259	hsa-miR-182-5p	TMPRSS2	0	0	0	1	0	0	0	3
MIMAT0000269	hsa-miR-212-3p	TMPRSS2	1	0	0	0	0	0	0	7
MIMAT0000281	hsa-miR-224-5p	TMPRSS2	1	0	0	0	0	0	0	8
MIMAT0000414	hsa-let-7g-5p	TMPRSS2	1	0	1	0	1	1	1	2
MIMAT0000415	hsa-let-7i-5p	TMPRSS2	1	0	1	0	1	1	1	9
MIMAT0000417	hsa-miR-15b-5p	TMPRSS2	1	0	0	0	0	0	0	5
MIMAT0000421	hsa-miR-122-5p	TMPRSS2	1	0	0	0	0	0	0	3
MIMAT0000426	hsa-miR-132-3p	TMPRSS2	1	0	0	0	0	0	0	7
MIMAT0000461	hsa-miR-195-5p	TMPRSS2	1	0	0	0	0	0	0	5
MIMAT0000510	hsa-miR-320a	TMPRSS2	1	0	0	0	0	0	0	7
MIMAT0000751	hsa-miR-330-3p	TMPRSS2	1	0	0	0	0	0	0	3
MIMAT0001080	hsa-miR-196b-5p	TMPRSS2	1	0	0	0	0	0	0	5
MIMAT0001341	hsa-miR-424-5p	TMPRSS2	1	0	0	0	0	0	0	8
MIMAT0001412	hsa-miR-18b-5p	TMPRSS2	1	0	0	0	0	0	0	3
MIMAT0002814	hsa-miR-432-5p	TMPRSS2	1	0	0	0	0	0	0	6
MIMAT0002816	hsa-miR-494-3p	TMPRSS2	1	0	0	0	1	0	0	3
MIMAT0002816	hsa-miR-494-3p	TMPRSS2	1	0	0	0	0	0	0	3
MIMAT0002817	hsa-miR-495-3p	TMPRSS2	1	0	0	0	0	0	0	6
MIMAT0002820	hsa-miR-497-5p	TMPRSS2	1	0	0	0	0	0	0	6
MIMAT0002821	hsa-miR-181d-5p	TMPRSS2	1	0	0	0	1	0	0	7
MIMAT0002823	hsa-miR-512-3p	TMPRSS2	1	0	0	0	0	0	0	8
MIMAT0002830	hsa-miR-520f-3p	TMPRSS2	1	0	0	0	0	0	0	8
MIMAT0002874	hsa-miR-503-5p	TMPRSS2	1	0	0	0	0	0	0	7
MIMAT0003150	hsa-miR-455-5p	TMPRSS2	1	0	0	0	0	0	0	8
MIMAT0003161	hsa-miR-493-3p	TMPRSS2	1	0	0	0	0	0	0	6
MIMAT0003244	hsa-miR-579-3p	TMPRSS2	1	0	1	1	0	0	0	2
MIMAT0003244	hsa-miR-579-3p	TMPRSS2	1	0	1	0	0	0	0	2
MIMAT0003247	hsa-miR-582-5p	TMPRSS2	1	0	1	1	0	0	0	6
MIMAT0003289	hsa-miR-620	TMPRSS2	1	0	0	0	0	0	0	0
MIMAT0003289	hsa-miR-620	TMPRSS2	1	0	0	0	0	0	0	0
MIMAT0003312	hsa-miR-642a-5p	TMPRSS2	1	0	0	0	0	0	0	4
MIMAT0003886	hsa-miR-769-5p	TMPRSS2	1	0	0	0	0	0	0	8
MIMAT0004805	hsa-miR-616-3p	TMPRSS2	1	0	0	0	0	0	0	4
MIMAT0004926	hsa-miR-708-5p	TMPRSS2	1	0	0	0	0	0	0	8
MIMAT0004926	hsa-miR-708-5p	TMPRSS2	1	0	0	0	0	0	0	8
MIMAT0004952	hsa-miR-665	TMPRSS2	1	0	1	0	0	0	0	5
MIMAT0004952	hsa-miR-665	TMPRSS2	1	0	1	0	0	0	0	5
MIMAT0005792	hsa-miR-320b	TMPRSS2	1	0	0	0	0	0	0	6
MIMAT0005793	hsa-miR-320c	TMPRSS2	1	0	0	0	0	0	0	4
MIMAT0005795	hsa-miR-1323	TMPRSS2	1	0	0	0	0	0	0	4
MIMAT0005796	hsa-miR-1271-5p	TMPRSS2	1	0	0	0	0	0	0	10
MIMAT0005885	hsa-miR-1295a	TMPRSS2	1	0	0	0	0	0	0	1
MIMAT0005919	hsa-miR-548o-3p	TMPRSS2	1	0	0	0	0	0	0	3
MIMAT0005923	hsa-miR-1269a	TMPRSS2	1	0	0	0	0	0	0	7
MIMAT0005924	hsa-miR-1270	TMPRSS2	1	0	1	0	0	0	0	1
MIMAT0005924	hsa-miR-1270	TMPRSS2	1	0	1	0	0	0	0	1
MIMAT0005930	hsa-miR-1276	TMPRSS2	1	0	0	0	0	0	0	3
MIMAT0006764	hsa-miR-320d	TMPRSS2	1	0	0	0	0	0	0	5
MIMAT0015007	hsa-miR-3139	TMPRSS2	0	0	1	0	0	0	0	2
MIMAT0015007	hsa-miR-3139	TMPRSS2	0	0	1	0	0	0	0	2
MIMAT0015056	hsa-miR-3179	TMPRSS2	0	0	0	1	0	0	0	0
MIMAT0018980	hsa-miR-4458	TMPRSS2	0	0	1	1	0	1	1	1
MIMAT0019036	hsa-miR-4500	TMPRSS2	0	0	1	0	0	1	1	0
MIMAT0022272	hsa-miR-664b-3p	TMPRSS2	0	0	0	1	0	0	0	6
MIMAT0022478	hsa-miR-5687	TMPRSS2	0	0	1	1	0	0	0	0

## Sheet: Cor ACE2-miRNA
miRNAid	miRNAname	GeneName	Cor	P value	Cancer type
MIMAT0005903	hsa-miR-1251-5p	ACE2	0.466	2.75e-29	KIRC
MIMAT0000450	hsa-miR-149-5p	ACE2	-0.324	6.03e-28	BRCA
MIMAT0004985	hsa-miR-942-5p	ACE2	0.282	2.76e-21	BRCA
MIMAT0000086	hsa-miR-29a-3p	ACE2	-0.36	2.78e-17	KIRC
MIMAT0000086	hsa-miR-29a-3p	ACE2	0.223	9.87e-14	BRCA
MIMAT0003267	hsa-miR-599	ACE2	0.31	5.23e-13	KIRC
MIMAT0000450	hsa-miR-149-5p	ACE2	-0.305	1.26e-12	KIRC
MIMAT0005903	hsa-miR-1251-5p	ACE2	0.464	1.1e-09	TGCT
MIMAT0000681	hsa-miR-29c-3p	ACE2	0.33	3.42e-09	CESC
MIMAT0005903	hsa-miR-1251-5p	ACE2	0.332	7.09e-09	KIRP
MIMAT0005903	hsa-miR-1251-5p	ACE2	-0.172	1.23e-08	BRCA
MIMAT0000681	hsa-miR-29c-3p	ACE2	0.239	4.15e-08	LUAD
MIMAT0004985	hsa-miR-942-5p	ACE2	-0.42	4.98e-08	TGCT
MIMAT0000435	hsa-miR-143-3p	ACE2	0.41	1.07e-07	TGCT
MIMAT0000100	hsa-miR-29b-3p	ACE2	-0.229	1.36e-07	KIRC
MIMAT0003328	hsa-miR-653-5p	ACE2	0.384	7.36e-07	TGCT
MIMAT0000435	hsa-miR-143-3p	ACE2	0.148	9.6e-07	BRCA
MIMAT0003267	hsa-miR-599	ACE2	0.282	1.12e-06	KIRP
MIMAT0000681	hsa-miR-29c-3p	ACE2	-0.145	1.54e-06	BRCA
MIMAT0000681	hsa-miR-29c-3p	ACE2	0.201	2.52e-06	UCEC
MIMAT0000100	hsa-miR-29b-3p	ACE2	0.198	3.71e-06	UCEC
MIMAT0004957	hsa-miR-760	ACE2	-0.236	4.55e-06	LIHC
MIMAT0000100	hsa-miR-29b-3p	ACE2	0.401	6.36e-06	THYM
MIMAT0022695	hsa-miR-212-5p	ACE2	-0.198	7.01e-06	THCA
MIMAT0000086	hsa-miR-29a-3p	ACE2	-0.209	8.34e-06	SKCM
MIMAT0004985	hsa-miR-942-5p	ACE2	0.19	1.59e-05	THCA
MIMAT0000450	hsa-miR-149-5p	ACE2	-0.185	1.63e-05	UCEC
MIMAT0000100	hsa-miR-29b-3p	ACE2	0.243	1.74e-05	CESC
MIMAT0002814	hsa-miR-432-5p	ACE2	-0.188	2.46e-05	HNSC
MIMAT0000681	hsa-miR-29c-3p	ACE2	0.184	2.67e-05	KIRC
MIMAT0003328	hsa-miR-653-5p	ACE2	-0.374	2.73e-05	THYM
MIMAT0000435	hsa-miR-143-3p	ACE2	0.256	2.83e-05	SARC
MIMAT0000086	hsa-miR-29a-3p	ACE2	0.235	3.27e-05	CESC
MIMAT0000681	hsa-miR-29c-3p	ACE2	0.181	4.71e-05	HNSC
MIMAT0000086	hsa-miR-29a-3p	ACE2	0.208	4.85e-05	OV
MIMAT0022695	hsa-miR-212-5p	ACE2	-0.354	7.68e-05	THYM
MIMAT0022695	hsa-miR-212-5p	ACE2	0.306	0.0001	TGCT
MIMAT0000435	hsa-miR-143-3p	ACE2	0.283	0.000127	PAAD
MIMAT0004957	hsa-miR-760	ACE2	-0.116	0.000132	BRCA
MIMAT0000086	hsa-miR-29a-3p	ACE2	0.333	0.000211	THYM
MIMAT0005903	hsa-miR-1251-5p	ACE2	-0.189	0.000223	OV
MIMAT0000100	hsa-miR-29b-3p	ACE2	0.187	0.000271	OV
MIMAT0000086	hsa-miR-29a-3p	ACE2	0.155	0.000422	LUAD
MIMAT0004985	hsa-miR-942-5p	ACE2	-0.312	0.000544	THYM
MIMAT0000435	hsa-miR-143-3p	ACE2	0.176	0.0006	OV
MIMAT0000100	hsa-miR-29b-3p	ACE2	-0.159	0.000718	SKCM
MIMAT0000681	hsa-miR-29c-3p	ACE2	-0.197	0.000745	KIRP
MIMAT0000435	hsa-miR-143-3p	ACE2	-0.193	0.001	KIRP
MIMAT0004957	hsa-miR-760	ACE2	0.294	0.00116	THYM
MIMAT0000100	hsa-miR-29b-3p	ACE2	0.142	0.00125	LUAD
MIMAT0000681	hsa-miR-29c-3p	ACE2	0.165	0.00132	OV
MIMAT0003328	hsa-miR-653-5p	ACE2	-0.097	0.00143	BRCA
MIMAT0000100	hsa-miR-29b-3p	ACE2	0.352	0.00146	ACC
MIMAT0000681	hsa-miR-29c-3p	ACE2	0.336	0.00155	MESO
MIMAT0004985	hsa-miR-942-5p	ACE2	-0.148	0.00162	SKCM
MIMAT0005903	hsa-miR-1251-5p	ACE2	0.447	0.00164	DLBC
MIMAT0005903	hsa-miR-1251-5p	ACE2	-0.135	0.00167	UCEC
MIMAT0000100	hsa-miR-29b-3p	ACE2	0.161	0.00178	STAD
MIMAT0000100	hsa-miR-29b-3p	ACE2	0.142	0.00188	LUSC
MIMAT0004957	hsa-miR-760	ACE2	-0.151	0.00222	BLCA
MIMAT0000681	hsa-miR-29c-3p	ACE2	0.187	0.00243	SARC
MIMAT0000086	hsa-miR-29a-3p	ACE2	0.335	0.00259	ACC
MIMAT0000450	hsa-miR-149-5p	ACE2	0.137	0.00272	LUSC
MIMAT0004957	hsa-miR-760	ACE2	0.319	0.00274	MESO
MIMAT0002814	hsa-miR-432-5p	ACE2	-0.129	0.00279	UCEC
MIMAT0000681	hsa-miR-29c-3p	ACE2	0.154	0.00292	STAD
MIMAT0000086	hsa-miR-29a-3p	ACE2	0.133	0.00295	HNSC
MIMAT0005903	hsa-miR-1251-5p	ACE2	-0.146	0.00305	BLCA
MIMAT0002814	hsa-miR-432-5p	ACE2	-0.125	0.00409	LGG
MIMAT0003328	hsa-miR-653-5p	ACE2	-0.149	0.0041	LIHC
MIMAT0003328	hsa-miR-653-5p	ACE2	-0.137	0.00543	BLCA
MIMAT0000681	hsa-miR-29c-3p	ACE2	0.308	0.00574	ACC
MIMAT0000450	hsa-miR-149-5p	ACE2	-0.213	0.00649	ESCA
MIMAT0000100	hsa-miR-29b-3p	ACE2	0.294	0.007	LAML
MIMAT0002814	hsa-miR-432-5p	ACE2	0.082	0.00717	BRCA
MIMAT0000681	hsa-miR-29c-3p	ACE2	0.139	0.00733	LIHC
MIMAT0003328	hsa-miR-653-5p	ACE2	-0.166	0.00737	SARC
MIMAT0000086	hsa-miR-29a-3p	ACE2	0.114	0.00821	UCEC
MIMAT0003267	hsa-miR-599	ACE2	-0.15	0.00845	CESC
MIMAT0000450	hsa-miR-149-5p	ACE2	-0.135	0.00901	OV
MIMAT0000435	hsa-miR-143-3p	ACE2	-0.117	0.00904	HNSC
MIMAT0002814	hsa-miR-432-5p	ACE2	-0.118	0.00989	LUSC
MIMAT0000086	hsa-miR-29a-3p	ACE2	0.133	0.0102	LIHC
MIMAT0002814	hsa-miR-432-5p	ACE2	-0.341	0.0102	UCS
MIMAT0000450	hsa-miR-149-5p	ACE2	-0.147	0.0122	KIRP
MIMAT0000435	hsa-miR-143-3p	ACE2	0.109	0.0128	LGG
MIMAT0003328	hsa-miR-653-5p	ACE2	0.272	0.013	LAML
MIMAT0003267	hsa-miR-599	ACE2	-0.112	0.0143	LUSC
MIMAT0000086	hsa-miR-29a-3p	ACE2	-0.107	0.0156	THCA
MIMAT0000086	hsa-miR-29a-3p	ACE2	0.118	0.0168	BLCA
MIMAT0005903	hsa-miR-1251-5p	ACE2	0.112	0.0174	SKCM
MIMAT0000100	hsa-miR-29b-3p	ACE2	-0.189	0.018	TGCT
MIMAT0000681	hsa-miR-29c-3p	ACE2	0.177	0.018	PAAD
MIMAT0002814	hsa-miR-432-5p	ACE2	-0.104	0.0181	LUAD
MIMAT0000100	hsa-miR-29b-3p	ACE2	-0.105	0.0182	THCA
MIMAT0000100	hsa-miR-29b-3p	ACE2	0.105	0.0194	HNSC
MIMAT0000100	hsa-miR-29b-3p	ACE2	-0.173	0.021	PAAD
MIMAT0003328	hsa-miR-653-5p	ACE2	-0.102	0.0215	THCA
MIMAT0022695	hsa-miR-212-5p	ACE2	-0.13	0.0269	KIRP
MIMAT0000100	hsa-miR-29b-3p	ACE2	-0.274	0.0271	KICH
MIMAT0000681	hsa-miR-29c-3p	ACE2	-0.177	0.0273	TGCT
MIMAT0004985	hsa-miR-942-5p	ACE2	0.173	0.0278	READ
MIMAT0000435	hsa-miR-143-3p	ACE2	-0.172	0.0284	ESCA
MIMAT0002814	hsa-miR-432-5p	ACE2	-0.096	0.0285	KIRC
MIMAT0000086	hsa-miR-29a-3p	ACE2	0.239	0.0296	LAML
MIMAT0002814	hsa-miR-432-5p	ACE2	0.174	0.0296	TGCT
MIMAT0003328	hsa-miR-653-5p	ACE2	-0.128	0.0297	KIRP
MIMAT0004957	hsa-miR-760	ACE2	-0.124	0.03	CESC
MIMAT0022695	hsa-miR-212-5p	ACE2	-0.269	0.0301	KICH
MIMAT0004985	hsa-miR-942-5p	ACE2	0.112	0.0309	STAD
MIMAT0000681	hsa-miR-29c-3p	ACE2	0.099	0.0315	LUSC
MIMAT0002814	hsa-miR-432-5p	ACE2	0.31	0.0341	DLBC
MIMAT0000450	hsa-miR-149-5p	ACE2	-0.092	0.0359	LGG
MIMAT0022695	hsa-miR-212-5p	ACE2	0.107	0.0378	OV
MIMAT0022695	hsa-miR-212-5p	ACE2	-0.232	0.0383	UVM
MIMAT0005903	hsa-miR-1251-5p	ACE2	0.275	0.04	UCS
MIMAT0005903	hsa-miR-1251-5p	ACE2	0.09	0.0408	LUAD
MIMAT0000681	hsa-miR-29c-3p	ACE2	0.223	0.0428	LAML
MIMAT0005903	hsa-miR-1251-5p	ACE2	0.151	0.044	PAAD
MIMAT0000086	hsa-miR-29a-3p	ACE2	0.104	0.0453	STAD
MIMAT0000681	hsa-miR-29c-3p	ACE2	0.249	0.0453	KICH
MIMAT0003267	hsa-miR-599	ACE2	-0.09	0.0453	HNSC
MIMAT0004957	hsa-miR-760	ACE2	-0.095	0.0453	SKCM
MIMAT0004957	hsa-miR-760	ACE2	0.335	0.0459	CHOL
MIMAT0003328	hsa-miR-653-5p	ACE2	-0.157	0.0464	ESCA
MIMAT0000086	hsa-miR-29a-3p	ACE2	0.214	0.048	MESO
MIMAT0000086	hsa-miR-29a-3p	ACE2	0.089	0.0482	PRAD
MIMAT0004957	hsa-miR-760	ACE2	-0.218	0.0482	LAML
MIMAT0000681	hsa-miR-29c-3p	ACE2	0.155	0.0488	ESCA
MIMAT0004957	hsa-miR-760	ACE2	0.088	0.0498	PRAD

## Sheet: miRNA expression in pan-cancer
miRNAid	miRNAname	Cancer number	Normal number	Cancer expression	Normal expression	Fold change	P value	FDR	Cancer type
MIMAT0000086	hsa-miR-29a-3p	497	44	6830.08	15656.9	0.44	1.2e-23	1e-21	HNSC
MIMAT0000086	hsa-miR-29a-3p	1085	104	4806.79	7662.53	0.63	2e-19	3.3e-18	BRCA
MIMAT0000086	hsa-miR-29a-3p	475	38	6651.69	12578.9	0.53	2.2e-17	5.2e-16	LUSC
MIMAT0000086	hsa-miR-29a-3p	370	50	7378.83	12128.9	0.61	2.3e-12	7.3e-11	LIHC
MIMAT0000086	hsa-miR-29a-3p	538	33	4684.49	9237.46	0.51	5.4e-11	6.9e-10	UCEC
MIMAT0000086	hsa-miR-29a-3p	289	32	5876.99	8973.55	0.65	5.4e-08	5.8e-07	KIRP
MIMAT0000086	hsa-miR-29a-3p	517	71	4974.26	6332.44	0.79	1.8e-07	1.5e-06	KIRC
MIMAT0000086	hsa-miR-29a-3p	65	24	13902.2	8967.99	1.55	0.0034	0.018	KICH
MIMAT0000086	hsa-miR-29a-3p	495	52	6073.79	6796.17	0.89	0.0043	0.026	PRAD
MIMAT0000100	hsa-miR-29b-3p	450	8	906.32	17.75	51.07	1.3e-43	6e-42	COAD
MIMAT0000100	hsa-miR-29b-3p	512	20	1008.02	182.25	5.53	5.1e-34	5.7e-32	LUAD
MIMAT0000100	hsa-miR-29b-3p	408	19	804.44	358.05	2.25	3.1e-09	3.9e-08	BLCA
MIMAT0000100	hsa-miR-29b-3p	1085	104	682.66	394.78	1.73	1.5e-08	1.1e-07	BRCA
MIMAT0000100	hsa-miR-29b-3p	289	32	510.42	754.18	0.68	6.3e-05	0.00043	KIRP
MIMAT0000100	hsa-miR-29b-3p	65	24	1074.86	649.21	1.66	0.0005	0.0032	KICH
MIMAT0000100	hsa-miR-29b-3p	370	50	659.68	728.52	0.91	0.0085	0.037	LIHC
MIMAT0000100	hsa-miR-29b-3p	495	52	467.77	412.77	1.13	0.0075	0.043	PRAD
MIMAT0000100	hsa-miR-29b-3p	509	58	1753.19	1424.63	1.23	0.013	0.047	THCA
MIMAT0000435	hsa-miR-143-3p	1085	104	42854.8	96711.7	0.44	5e-35	2.1e-33	BRCA
MIMAT0000435	hsa-miR-143-3p	538	33	56100.4	276450	0.2	6e-32	3.2e-30	UCEC
MIMAT0000435	hsa-miR-143-3p	475	38	56803.4	143923	0.39	5e-25	2.4e-23	LUSC
MIMAT0000435	hsa-miR-143-3p	495	52	328128	616828	0.53	7.7e-22	4.4e-20	PRAD
MIMAT0000435	hsa-miR-143-3p	289	32	23108	68311.2	0.34	5.1e-16	2e-14	KIRP
MIMAT0000435	hsa-miR-143-3p	408	19	134779	587471	0.23	1.8e-14	4.9e-13	BLCA
MIMAT0000435	hsa-miR-143-3p	65	24	29867.6	78236.9	0.38	9.3e-13	3.4e-11	KICH
MIMAT0000435	hsa-miR-143-3p	497	44	75369.5	172309	0.44	2.2e-12	4.2e-11	HNSC
MIMAT0000435	hsa-miR-143-3p	450	8	148452	23965.6	6.19	1.4e-10	1.6e-09	COAD
MIMAT0000435	hsa-miR-143-3p	372	32	193518	443164	0.44	3.6e-10	9.3e-09	STAD
MIMAT0000435	hsa-miR-143-3p	509	58	80334.6	114065	0.7	4.4e-07	4.4e-06	THCA
MIMAT0000435	hsa-miR-143-3p	512	20	83809.1	306435	0.27	3.3e-06	3.2e-05	LUAD
MIMAT0000435	hsa-miR-143-3p	370	50	49951.5	60011.9	0.83	0.00087	0.0053	LIHC
MIMAT0000435	hsa-miR-143-3p	517	71	74785.3	54599.3	1.37	0.0061	0.026	KIRC
MIMAT0000435	hsa-miR-143-3p	36	9	42211.7	26526.5	1.59	0.0036	0.045	CHOL
MIMAT0000450	hsa-miR-149-5p	475	38	249.46	21.82	11.43	5e-34	5e-32	LUSC
MIMAT0000450	hsa-miR-149-5p	450	8	14.21	248.22	0.06	8.6e-22	1.8e-20	COAD
MIMAT0000450	hsa-miR-149-5p	517	71	9.82	25.54	0.38	4.6e-21	1.1e-19	KIRC
MIMAT0000450	hsa-miR-149-5p	408	19	219.75	33.89	6.48	1.3e-13	3.1e-12	BLCA
MIMAT0000450	hsa-miR-149-5p	65	24	6.23	16.18	0.39	6.5e-09	1.1e-07	KICH
MIMAT0000450	hsa-miR-149-5p	538	33	94.26	28.69	3.29	1.3e-07	1.2e-06	UCEC
MIMAT0000450	hsa-miR-149-5p	495	52	80.16	48.97	1.64	7.6e-05	0.0007	PRAD
MIMAT0000450	hsa-miR-149-5p	372	32	20.8	32.9	0.63	0.001	0.007	STAD
MIMAT0000450	hsa-miR-149-5p	289	32	19.15	17.41	1.1	0.0051	0.024	KIRP
MIMAT0000450	hsa-miR-149-5p	36	9	18.52	5.82	3.19	0.0034	0.042	CHOL
MIMAT0000681	hsa-miR-29c-3p	497	44	1853.32	6591.75	0.28	1.6e-25	1.8e-23	HNSC
MIMAT0000681	hsa-miR-29c-3p	289	32	1345.54	3846.98	0.35	1.8e-22	1.5e-20	KIRP
MIMAT0000681	hsa-miR-29c-3p	370	50	1904.13	4369.16	0.44	5e-22	5.4e-20	LIHC
MIMAT0000681	hsa-miR-29c-3p	475	38	2247.48	5317.39	0.42	1.8e-18	4.6e-17	LUSC
MIMAT0000681	hsa-miR-29c-3p	450	8	1035.51	167.85	6.17	1.1e-11	1.4e-10	COAD
MIMAT0000681	hsa-miR-29c-3p	372	32	2426.09	6293.76	0.39	6.4e-12	2.1e-10	STAD
MIMAT0000681	hsa-miR-29c-3p	538	33	999.19	2330.53	0.43	3.6e-11	4.8e-10	UCEC
MIMAT0000681	hsa-miR-29c-3p	509	58	5580.96	8503.93	0.66	6e-11	1.1e-09	THCA
MIMAT0000681	hsa-miR-29c-3p	512	20	3305.34	2776.47	1.19	7.6e-07	7.8e-06	LUAD
MIMAT0000681	hsa-miR-29c-3p	162	11	1594.36	4477.95	0.36	1.3e-06	7.3e-05	ESCA
MIMAT0000681	hsa-miR-29c-3p	65	24	2009.42	3271.87	0.61	6.5e-05	0.00052	KICH
MIMAT0000681	hsa-miR-29c-3p	36	9	1702.72	2732.51	0.62	0.0041	0.049	CHOL
MIMAT0002814	hsa-miR-432-5p	1085	104	6.48	15.04	0.43	6.4e-18	9.7e-17	BRCA
MIMAT0002814	hsa-miR-432-5p	497	44	8.24	16.34	0.5	6.7e-09	7.8e-08	HNSC
MIMAT0002814	hsa-miR-432-5p	450	8	5.75	34.17	0.17	2e-07	1.6e-06	COAD
MIMAT0002814	hsa-miR-432-5p	289	32	1.41	3.77	0.37	1e-06	9.6e-06	KIRP
MIMAT0002814	hsa-miR-432-5p	65	24	2.99	3.87	0.77	1.4e-05	0.00012	KICH
MIMAT0002814	hsa-miR-432-5p	509	58	1.8	2.13	0.85	0.00032	0.0019	THCA
MIMAT0002814	hsa-miR-432-5p	517	71	3.09	3.88	0.79	0.0013	0.0061	KIRC
MIMAT0003267	hsa-miR-599	517	71	0.83	0.05	17.59	6e-06	4.2e-05	KIRC
MIMAT0003267	hsa-miR-599	289	32	1.32	0.21	6.28	0.0011	0.0061	KIRP
MIMAT0003267	hsa-miR-599	65	24	0.01	0.04	0.31	0.0072	0.034	KICH
MIMAT0003328	hsa-miR-653-5p	450	8	8.97	0.01	897.38	7.6e-25	1.8e-23	COAD
MIMAT0003328	hsa-miR-653-5p	512	20	32.58	4.13	7.9	8.5e-21	3.7e-19	LUAD
MIMAT0003328	hsa-miR-653-5p	538	33	20.39	1.78	11.46	2e-15	3.3e-14	UCEC
MIMAT0003328	hsa-miR-653-5p	289	32	25.48	37.6	0.68	2.2e-07	2.2e-06	KIRP
MIMAT0003328	hsa-miR-653-5p	408	19	8.09	1.63	4.97	5.3e-06	4.6e-05	BLCA
MIMAT0003328	hsa-miR-653-5p	495	52	2.27	1.19	1.9	4.1e-06	4.6e-05	PRAD
MIMAT0003328	hsa-miR-653-5p	497	44	5.43	9.39	0.58	6.6e-06	5.2e-05	HNSC
MIMAT0003328	hsa-miR-653-5p	517	71	132.79	43.51	3.05	0.0038	0.017	KIRC
MIMAT0004957	hsa-miR-760	1085	104	3.43	0.53	6.43	9.3e-20	1.6e-18	BRCA
MIMAT0004957	hsa-miR-760	517	71	1.11	0.21	5.25	3.9e-17	7e-16	KIRC
MIMAT0004957	hsa-miR-760	538	33	3.56	0.51	6.93	4.7e-09	4.8e-08	UCEC
MIMAT0004957	hsa-miR-760	495	52	0.29	0.73	0.4	9.7e-08	1.4e-06	PRAD
MIMAT0004957	hsa-miR-760	475	38	3.83	0.51	7.51	1.5e-07	1.5e-06	LUSC
MIMAT0004957	hsa-miR-760	450	8	1.04	6.06	0.17	0.00012	0.0007	COAD
MIMAT0004957	hsa-miR-760	370	50	0.64	0.21	3.04	0.0013	0.0073	LIHC
MIMAT0004957	hsa-miR-760	408	19	2.28	0.34	6.63	0.002	0.011	BLCA
MIMAT0004957	hsa-miR-760	162	11	0.8	0.11	7.47	0.00077	0.013	ESCA
MIMAT0004957	hsa-miR-760	289	32	0.75	0.28	2.68	0.0027	0.013	KIRP
MIMAT0004957	hsa-miR-760	372	32	1.02	0.3	3.37	0.0033	0.019	STAD
MIMAT0004985	hsa-miR-942-5p	538	33	10.35	1.77	5.85	9.6e-22	2.6e-20	UCEC
MIMAT0004985	hsa-miR-942-5p	509	58	3.14	8.07	0.39	6.7e-22	4.4e-20	THCA
MIMAT0004985	hsa-miR-942-5p	408	19	9.62	2.29	4.2	2.1e-15	6.3e-14	BLCA
MIMAT0004985	hsa-miR-942-5p	289	32	3.07	1.45	2.12	3.6e-07	3.5e-06	KIRP
MIMAT0004985	hsa-miR-942-5p	497	44	10.88	6.63	1.64	5.3e-07	4.7e-06	HNSC
MIMAT0004985	hsa-miR-942-5p	162	11	11.88	4.32	2.75	6.8e-07	4.6e-05	ESCA
MIMAT0004985	hsa-miR-942-5p	372	32	11.44	6.39	1.79	1.6e-05	0.00017	STAD
MIMAT0004985	hsa-miR-942-5p	65	24	4.42	2.18	2.02	7.1e-05	0.00056	KICH
MIMAT0004985	hsa-miR-942-5p	475	38	12.73	7.49	1.7	0.00024	0.0015	LUSC
MIMAT0004985	hsa-miR-942-5p	517	71	3.38	1.65	2.05	0.0011	0.0054	KIRC
MIMAT0005903	hsa-miR-1251-5p	497	44	0.07	0.61	0.12	8.9e-22	5.7e-20	HNSC
MIMAT0005903	hsa-miR-1251-5p	65	24	0.71	18.54	0.04	2.6e-13	1.1e-11	KICH
MIMAT0005903	hsa-miR-1251-5p	517	71	6.91	27.87	0.25	1.9e-11	2.3e-10	KIRC
MIMAT0005903	hsa-miR-1251-5p	289	32	3.96	19.31	0.21	4.3e-11	7.8e-10	KIRP
MIMAT0005903	hsa-miR-1251-5p	370	50	2.26	0.05	43.03	7e-08	1e-06	LIHC
MIMAT0005903	hsa-miR-1251-5p	1085	104	2.46	0.25	9.9	0.00086	0.0034	BRCA
MIMAT0005903	hsa-miR-212-5p	65	24	0.1	0.35	0.29	2.6e-05	0.00022	KICH
MIMAT0022695	hsa-miR-212-5p	372	32	0.53	0.2	2.57	9.9e-05	0.0009	STAD
MIMAT0022695	hsa-miR-212-5p	517	71	0.24	0.34	0.72	0.0056	0.024	KIRC

## Sheet: miRNA survival
miRNAid	miRNAname	Cancer number	Meadian	Coef	HR	P value	Cancer type
MIMAT0000086	hsa-miR-29a-3p	261	2501.51	-0.49	0.61	0.018	SARC
MIMAT0000086	hsa-miR-29a-3p	183	6271.73	-2.06	0.13	0.022	PCPG
MIMAT0000086	hsa-miR-29a-3p	85	6402.96	-0.54	0.58	0.027	MESO
MIMAT0000086	hsa-miR-29a-3p	80	11493.2	0.93	2.54	0.035	UVM
MIMAT0000100	hsa-miR-29b-3p	517	557.17	0.57	1.77	0.00029	KIRC
MIMAT0000100	hsa-miR-29b-3p	85	1053.98	-0.63	0.53	0.0098	MESO
MIMAT0000100	hsa-miR-29b-3p	118	1732.08	2.25	9.5	0.0099	THYM
MIMAT0000100	hsa-miR-29b-3p	503	850.76	-0.33	0.72	0.027	LUAD
MIMAT0000100	hsa-miR-29b-3p	495	453.09	-0.3	0.74	0.033	HNSC
MIMAT0000435	hsa-miR-143-3p	523	6017.77	0.56	1.76	0.0014	LGG
MIMAT0000435	hsa-miR-143-3p	178	62615.6	0.68	1.96	0.0014	PAAD
MIMAT0000435	hsa-miR-143-3p	406	82071.8	0.36	1.44	0.016	BLCA
MIMAT0000435	hsa-miR-143-3p	495	50866.1	0.33	1.4	0.016	HNSC
MIMAT0000435	hsa-miR-143-3p	80	8223.9	0.91	2.47	0.036	UVM
MIMAT0000450	hsa-miR-149-5p	369	6.89	0.97	2.63	1.7e-07	LIHC
MIMAT0000450	hsa-miR-149-5p	517	6.53	0.57	1.77	0.00025	KIRC
MIMAT0000450	hsa-miR-149-5p	523	88.3	0.58	1.78	0.0012	LGG
MIMAT0000450	hsa-miR-149-5p	495	55.48	-1.69	0.18	0.022	PRAD
MIMAT0000450	hsa-miR-149-5p	79	47.17	0.86	2.35	0.027	ACC
MIMAT0000450	hsa-miR-149-5p	75	2.26	0.62	1.86	0.035	LAML
MIMAT0000450	hsa-miR-149-5p	509	18.08	1.15	3.14	0.036	THCA
MIMAT0000681	hsa-miR-29c-3p	79	1409.97	-1.72	0.18	2.1e-05	ACC
MIMAT0000681	hsa-miR-29c-3p	85	961.45	-1.05	0.35	3.9e-05	MESO
MIMAT0000681	hsa-miR-29c-3p	261	272.57	-0.67	0.51	0.0011	SARC
MIMAT0000681	hsa-miR-29c-3p	440	471.68	-0.38	0.68	0.0059	SKCM
MIMAT0000681	hsa-miR-29c-3p	503	2639.11	-0.36	0.69	0.015	LUAD
MIMAT0000681	hsa-miR-29c-3p	406	1846.93	-0.34	0.71	0.025	BLCA
MIMAT0000681	hsa-miR-29c-3p	56	168.61	0.77	2.17	0.028	UCS
MIMAT0002814	hsa-miR-432-5p	495	5.31	0.44	1.55	0.0014	HNSC
MIMAT0002814	hsa-miR-432-5p	523	11.02	0.54	1.72	0.0019	LGG
MIMAT0002814	hsa-miR-432-5p	79	184.24	0.94	2.57	0.016	ACC
MIMAT0002814	hsa-miR-432-5p	288	0.9	0.74	2.1	0.017	KIRP
MIMAT0002814	hsa-miR-432-5p	183	635.28	1.99	7.29	0.03	PCPG
MIMAT0002814	hsa-miR-432-5p	374	16.81	0.28	1.32	0.037	OV
MIMAT0002814	hsa-miR-432-5p	406	5.61	0.31	1.36	0.044	BLCA
MIMAT0003267	hsa-miR-599	288	0.18	-0.79	0.45	0.0096	KIRP
MIMAT0003328	hsa-miR-653-5p	85	10.14	-0.76	0.47	0.002	MESO
MIMAT0003328	hsa-miR-653-5p	365	3.8	0.5	1.65	0.0033	STAD
MIMAT0003328	hsa-miR-653-5p	495	3.97	-0.33	0.72	0.016	HNSC
MIMAT0003328	hsa-miR-653-5p	306	3.15	-0.57	0.57	0.018	CESC
MIMAT0003328	hsa-miR-653-5p	79	6.32	-0.87	0.42	0.026	ACC
MIMAT0003328	hsa-miR-653-5p	36	6.94	-1.02	0.36	0.045	CHOL
MIMAT0004957	hsa-miR-760	374	27.07	-0.47	0.63	0.00047	OV
MIMAT0004957	hsa-miR-760	369	0.37	0.57	1.78	0.0015	LIHC
MIMAT0004957	hsa-miR-760	523	2.12	0.39	1.48	0.025	LGG
MIMAT0004985	hsa-miR-942-5p	523	1.02	0.8	2.22	6.1e-06	LGG
MIMAT0004985	hsa-miR-942-5p	118	34.51	-20.41	0	0.001	THYM
MIMAT0004985	hsa-miR-942-5p	80	7.06	-1.13	0.32	0.0094	UVM
MIMAT0004985	hsa-miR-942-5p	469	9.49	-0.32	0.73	0.029	LUSC
MIMAT0004985	hsa-miR-942-5p	159	8.17	-0.91	0.4	0.032	READ
MIMAT0005903	hsa-miR-1251-5p	517	1.77	-0.37	0.69	0.017	KIRC
MIMAT0005903	hsa-miR-1251-5p	79	0.46	0.77	2.17	0.045	ACC
MIMAT0022695	hsa-miR-212-5p	80	2.17	2.24	9.39	2.5e-05	UVM
MIMAT0022695	hsa-miR-212-5p	79	0.24	1.62	5.06	9.7e-05	ACC
MIMAT0022695	hsa-miR-212-5p	178	0.48	-0.59	0.56	0.0054	PAAD
MIMAT0022695	hsa-miR-212-5p	503	0.27	0.35	1.43	0.018	LUAD
MIMAT0022695	hsa-miR-212-5p	261	0.4	0.45	1.56	0.028	SARC
MIMAT0022695	hsa-miR-212-5p	183	1.31	-1.97	0.14	0.032	PCPG
